# Effect of therapeutic ultrasound on the mechanical and biological properties of fibroblasts

Rosy P. Cárdenas-Sandoval<sup>1,2\*</sup>, Homero F. Pastrana-Rendón<sup>3,8</sup>, Alba G. Ávila-Bernal<sup>3</sup>, Angélica M. Ramírez-Martínez<sup>4</sup>, Myriam L. Navarrete-Jimenez<sup>5</sup>, Alejandro O. Ondo-Mendez<sup>6</sup>, Diego A. Garzón-Alvarado<sup>2,7</sup>

<sup>1</sup>Rehabilitation Science Research Group, School of Medicine and Health Sciences, Universidad del Rosario; Bogotá, Colombia, 111221

<sup>2</sup>Organ and Tissue Mechanobiology Research Group. Biotechnology Institute, Universidad Nacional de Colombia; Bogotá, Colombia, 111321

<sup>3</sup>Microelectronics Research Center. Department of Electrical and Electronic Engineering, Universidad de los Andes; Bogotá, Colombia, 111711

<sup>4</sup>Department of Biomedical Engineering, Universidad Militar Nueva Granada, sede Campus; Cajicá, Colombia, 250247

<sup>5</sup>Department of Microbiology, Faculty of Medicine, Universidad Nacional de Colombia; Bogotá, Colombia, 111321

<sup>6</sup>Clinical Research Group, School of Medicine and Health Sciences, Universidad del Rosario; Bogotá, Colombia, 111221

<sup>7</sup>Department of Mechanical and Mechatronics Engineering, Universidad Nacional de Colombia; Bogotá, Colombia, 111321

20           <sup>8</sup>Currently at Doctorado en Ciencias de la Salud, Universidad Antonio Nariño, Bogotá,

21           Colombia, 111821

22           \*Corresponding author. Email: [rosy.cardenas@urosario.edu.co](mailto:rosy.cardenas@urosario.edu.co)

## 23 **Abstract**

24 Conventional doses of therapeutic ultrasound alter the mechanical behavior of ligament fibroblasts  
25 to improve the regenerative and remodeling stages of the wound healing process. Using a  
26 multidisciplinary approach, we applied ultrasound doses of 1.0 and 2.0 W/cm<sup>2</sup> at 1 MHz frequency  
27 for five days on ligament fibroblasts. Atomic force microscopy showed a decrease in cell elastic  
28 modulus for both doses, but the treated cells were still viable based on flow cytometry. Finite  
29 element method analysis exhibited visible cytoskeleton displacements and decreased harmonics in  
30 treated cells. Colorimetric assay revealed increased cell proliferation, while scratch assay showed  
31 increased migration at low doses. An increase in collagen and fibronectin was detected by enzyme-  
32 linked immunoassay at high doses, and  $\beta$ -actin expression for both treatments was visualized  
33 through immunofluorescence imaging. Both doses of ultrasound altered the fibroblast mechanical  
34 properties due to cytoskeletal reorganization and enhanced the early and late stages of cell repair.

## 35 **Introduction**

36 Therapeutic ultrasound produces sound waves to create vibrations that exert forces on cells and  
37 stimulate the regenerative and remodeling stages coordinated by fibroblasts during the wound  
38 healing process [1–3]. Nevertheless, the exact dose of ultrasound that may affect the ligament  
39 fibroblast elastic modulus and harmonic vibration to improve the regenerative and remodeling  
40 stages remain largely elusive. The elastic modulus of cells is a biomarker that determines several  
41 biological responses such as communication with the environment, cell death, aging, and cellular  
42 motility [4–6]. It may also influence the harmonic vibration (i.e., the natural frequencies of  
43 vibration of the cell structure) [7], which is the rate at which the structure oscillates at a point of  
44 balance without being affected by an external force [8].

45 Therapeutic ultrasound generates a micro-massaging effect caused by compression and negative  
46 pressure resulting from micro-vibration and cavitation [9–13]. Cellular transmembrane receptors  
47 such as integrins and cadherins detect these forces, and consequently, external stimuli are  
48 conducted rapidly along cytoskeleton filaments and absorbed at reserved edges in the cytoplasm  
49 and nucleus, modifying the cellular genome activities by increasing collagen synthesis and  
50 activating the mitotic activity of cells [14–16].

51 Cells react to external physical stimuli caused by ultrasound by altering their cytoskeleton, which  
52 is the structure responsible for regulating the mechanical behavior of cells. The cytoskeleton  
53 maintains the cell shape, responds to external mechanical cues, exerts forces, and produces motion  
54 [13,17,18]. It transduces the mechanical signal and converts it into a biological response associated  
55 with the wound healing process. This is evidenced by measuring changes in the cell mechanical  
56 properties [4–6,17,19–22].

57 The mechanical and biological effects of applying conventional ultrasound doses of 0.1–3 W/cm<sup>2</sup>  
58 spatial average temporal average intensity (SATA) at 1–3 MHz frequency to ligament fibroblasts  
59 remains unclear [23]. Evidence so far has shown contradictory results: on the one hand, when  
60 therapeutic ultrasound is applied at conventional frequencies [9–12], there is no resonance effect.  
61 For example, when applying therapeutic ultrasound at 1 MHz and low intensities (less than 1.0  
62 W/cm<sup>2</sup>), cell proliferation and extracellular matrix (ECM) improve on dermal and periodontal  
63 ligament fibroblasts [23–27]. Moreover, this high frequency may modulate cell cytoskeleton  
64 organization [28,29] which in turn stimulates cell migration [30]. On the other hand, when  
65 applying ultrasound at low frequencies in the kilohertz range, a resonance effect occurs, in which  
66 the integrity of the cell structure may be compromised because of the oscillation at such  
67 frequencies that coincide with the harmonic vibration of the cell [7,31–33]. For example, when  
68 applying ultrasound at frequencies between 550 kHz and 650 kHz, cell death increases and cell  
69 proliferation decreases in breast cancer cells [34].

70 The effects of conventional doses of therapeutic ultrasound used in rehabilitation [23] on the elastic  
71 modulus and harmonic vibration (mechanical properties), as well as on the viability, proliferation,  
72 migration, and synthesis of the ECM (type I collagen, type III collagen, and fibronectin) and  $\beta$ -  
73 actin expression (biological properties) of ligament fibroblasts in joints remain uncertain [35–38].  
74 The controversy concerning the contradictory results of ultrasound and the lack of evidence  
75 motivated us to measure and demonstrate that the mechanical and biological properties can be  
76 modulated by the reorganization of the ligament fibroblast cytoskeleton after applying  
77 conventional doses of therapeutic ultrasound.

78 Therapeutic ultrasound modifies the cell elastic modulus and its harmonic vibration, while cells  
79 reorganize their cytoskeleton structure without resonance or harmful effects. It also improves the  
80 regenerative and remodeling functions of ligament fibroblasts. This complex effect cannot be

81 evaluated by clinical assessment of a physiotherapist. Thus, we applied a multidisciplinary  
82 approach that integrates *in vitro* and computational techniques to assess the effects on the  
83 mechanical and biological responses of ligament fibroblasts of joints by applying two intensities  
84 of conventional therapeutic ultrasound, namely, a low dose of 1.0 W/cm<sup>2</sup> and a high dose of 2.0  
85 W/cm<sup>2</sup>, both at a frequency of 1 MHz. Furthermore, we determined the specific ultrasound dose  
86 required to improve the regenerative (early) and remodeling (late) phases of the ligament fibroblast  
87 healing process.

88

## 89 **Materials and Methods**

90 An explant technique was used to obtain ligament fibroblasts. The protocol of ultrasound  
91 therapy applied to cultured cells followed the standard clinical guidelines for ligament treatment.  
92 We evaluated the effects of therapeutic ultrasound on the mechanical properties of ligament  
93 fibroblasts by measuring their elastic modulus using atomic force microscopy (AFM), and the  
94 harmonics of the natural frequencies of vibration of the ligament fibroblast cytoskeleton using a  
95 finite element method FEM analysis. Moreover, we evaluated the biological properties of  
96 ligament fibroblasts by performing the following experiments: cell viability using flow  
97 cytometry, fibroblast cell proliferation by a colorimetric assay), cell migration using scratch  
98 assay, ECM synthesis by enzyme-linked immunoassay (ELISA), and  $\beta$ -actin expression through  
99 immunofluorescence imaging. A diagram of the methodology is shown in Fig 1.

100

101 **Fig 1. Diagram of the methodology.** (1) Ligament explant, (2) ultrasound stimulation, (3)  
102 measurement of mechanical and biological parameters, and (4) statistical analysis.

103

104

105

## Ligament fibroblast explant

106

107

108

109

110

111

112

113

114

115

116

Fibroblast cells were obtained using an explant technique from the lateral collateral ligaments (LCLs) of both knees of one adult male Wistar rat, as depicted in Fig 2A–B, following a previously described protocol [39]. The experiments were performed according to the international regulations of laboratory animals. Moreover, the animal studies and research protocols were approved by a local ethics committee (Protocol Number:FC-13-01082016). The LCLs were maintained under aseptic conditions in a 1:1 mixture of Dulbecco's modified Eagle medium and nutrient mixture F-12 (DMEM/F12; DF-041-B; Merck Millipore) supplemented with 1% antibiotic/antifungal (15240062; Gibco) and 10% fetal bovine serum (FBS; 12657029; Gibco). Dissection was performed with the aid of a scalpel to cut the femoral and fibular insertions. The LCLs were placed into T-25 culture flasks containing a sterile supplemented culture medium, as exhibited in Fig 2C. The culture medium was changed every 48 h.

117

118

119

120

121

122

123

124

125

126

The flasks were incubated at 37°C in a humidified atmosphere containing 5% CO<sub>2</sub>. After 15 days, the monolayer cultures became confluent, and the tissues were removed from the flasks. Explanted cells were washed with Hank's balanced salt solution (14065056; Gibco), detached using 0.025% trypsin (15400054; Gibco) for 5 min, centrifuged at 287×g for 5 min, and subcultured for subsequent experiments. The remaining cells were cryopreserved in a mixture of 10% DMEM/F12, 80% FBS, and 10% dimethyl sulfoxide.

**Fig 2. Ligament fibroblast explant.** (A) Adult male Wistar rat; (B) lateral collateral ligament (LCL); (C) ligament tissues cultured in a T-25 culture flask.

127

128 To ensure that the cells explanted from the ligaments corresponded to fibroblasts, their  
129 nuclei and bodies were highlighted using hematoxylin-eosin staining (H&E) and microscopic  
130 observation [40]. We followed the laboratory protocol described by Spitalnik [41].

131

## 132 **Pulsed ultrasound intensity and application time**

133 We applied energies of 1.5 and 5.0 J/cm<sup>2</sup> for five days to the two treatment groups that we  
134 designed. These energies correspond to 5% and 17% of the 30 J/cm<sup>2</sup> applied in human therapy  
135 [42–46]. Treatment Group A received 1.0 W/cm<sup>2</sup> (low dose), whereas treatment Group B  
136 received 2.0 W/cm<sup>2</sup> (high dose) of the maximum intensity. The SATA values were 0.5 W/cm<sup>2</sup>  
137 and 1.0 W/cm<sup>2</sup> for treatment Groups A and B, respectively. A layer of sound wave transmission  
138 gel was applied over the transducer, and the culture plates were then placed over the ultrasound  
139 device. Control cells were processed in the same way but without turning the device on. For both  
140 treatments, a standard “J-Style” (JC-2902) ultrasound device was used following the standard  
141 clinical procedures for ligament therapy [47].

142 Based on the ultrasound parameters and the surface area of the plate culture, the application  
143 time  $t$  of the ultrasound was calculated using the potency equation of energy transmission  
144 [11,12,48], expressed as Equation 1.

145

$$146 \quad t = \frac{e \cdot a_c}{I \cdot a_t \cdot D} \quad (1)$$

147

148 Here,  $e$  is the energy per square centimeter [49],  $I$  is the transducer intensity,  $a_t$  is the effective  
149 radiated area,  $D$  is the duty cycle, and  $a_c$  is the culture area. The application time for each culture



150 plate is listed in Table 1. The control group used the same surface area of plate cultures for every  
151 experiment as that in the treatment groups with no ultrasound.

152

153 **Table 1. Surface area and application time of ultrasound in each treatment group.**

154

| Experiment variable                                               | Surface area of plate culture (cm <sup>2</sup> ) | Ultrasound application time (s)            |                                             |
|-------------------------------------------------------------------|--------------------------------------------------|--------------------------------------------|---------------------------------------------|
|                                                                   |                                                  | Group A (low dose: 1.0 W/cm <sup>2</sup> ) | Group B (high dose: 2.0 W/cm <sup>2</sup> ) |
| <i>Elastic modulus</i><br>Petri dish                              | 11.78                                            | 7                                          | 12                                          |
| <i>Viability</i><br>6-well plate                                  | 3.5                                              | 2.1                                        | 3.5                                         |
| <i>Cell proliferation</i><br>96-well plate<br>(groups of 9 wells) | 5                                                | 3                                          | 5                                           |
| <i>Migration</i><br>12-well plate                                 | 109.9                                            | 66                                         | 110                                         |
| <i>ECM synthesis</i><br>6-well plate                              | 3.5                                              | 2.1                                        | 3.5                                         |

155

156

## 157 **Fibroblast elastic modulus by AFM**

158 Fibroblasts ( $3.5 \times 10^2$  cells from each treatment group) were cultured in Petri dishes (3.5 cm  
159 diameter) and reached 20–40% confluency on the 6<sup>th</sup> day. We measured the elastic modulus of  
160 proliferating viable cells maintained in DMEM/F12 within 2–3 h. Changes in the cell elastic  
161 modulus were monitored using AFM (MFP3D-Bio AFM system, Asylum Research, Santa  
162 Barbara, CA) [50,51].

163 Soft cantilevers T R400P B (Olympus, Japan) with a nominal spring constant of 0.09 N/m, a  
164 tip radius of 42 nm, and a half-opening angle of 35° were employed. The relative trigger force  
165 was 2 nN. The elastic modulus was estimated as a function of the position on the cell using the  
166 force–volume technique by measuring the cantilever deflection. We used a video microscope to  
167 position the AFM tip at precise locations over the cell surface. The probe moved up and down,  
168 simultaneously registering the force curve and cell topography at each pixel of the surface. We  
169 obtained force–volume images with a resolution of  $20 \times 20$  pixels within  $30 \times 30 \mu\text{m}^2$  scan areas  
170 for 10 cells per group. The approximate acquisition time per image was 15 min.

171 The numbers of effective measurements performed for Groups A, B, and C were 863, 866,  
172 and 338 indentations, respectively. We used a larger sample to better calculate the average values  
173 of the elastic modulus and avoid errors associated with the indentation depth. Force curves  
174 determined from a relative area above the whole cell enabled the comparison of induced changes  
175 to a constant force. Because the elastic modulus (calculated using the Sneddon model) may  
176 create a substrate effect, which is a source of error, due to sharp probe indentation producing a  
177 larger depth [52], we used an asymptotical correction model to nullify the bottom substrate effect  
178 for rigid cone indenting [53], as indicated in Equation 2.

179

$$F_e = \frac{8E}{3\pi} \tan(\theta) \delta^2 \left\{ 1 + C \frac{4}{\pi^2} \frac{\delta}{h} + C^2 \frac{20}{\pi^4} \frac{\delta^2}{h^2} + O\left(\frac{\delta^3}{h^3}\right) \right\} \quad (2)$$

Here,  $F_e$  is the elastic force,  $E$  is the elastic modulus,  $\delta$  is the indentation depth,  $\theta$  is the rigid cone angle (set as  $35^\circ$ ),  $h$  is the thickness of adherent cells at the point of indentation (set as 150 nm),  $O$  represents higher-order terms in the series (assumed to be negligible), and  $C = 1.7795 \tan(\theta)$  [53]. Refer to the supporting information (S1 File) for additional details.

## Harmonic vibration and modal analysis by finite element method (FEM)

We proposed a simplified theoretical model to consider only the cytoskeleton, as it predominantly determines cell mechanics and its response to external stimuli. Without the network of filaments that compose the cytoskeleton (actin, intermediate filaments, and microtubules), fibroblasts will be extremely deformable to preserve their shape and biological response (proliferation, migration, and synthesis of the ECM) in the wound healing process [54,55]. Then, we performed an FEM analysis to simulate the harmonics of the natural frequencies of vibration of the ligament fibroblast cytoskeleton using the eigenvalue extraction method Lanczos (ABAQUS/CAE 6.12.3 software). Modal analysis was used to predict the 50<sup>th</sup> natural frequencies and eigenforms of the cytoskeleton. A three-dimensional (3D) octahedron tensegrity model with 12 coordinates and 30 beam elements represented the cytoskeleton (Fig 3) [56]. As the cytoskeleton is composed of a protein network of filaments, the tensegrity structure mimics 12 actin filament beams, 12 intermediate filament beams, and microtubule beams. The actin filaments were located in the cortex, the intermediate filaments in the middle, and the microtubules were in the center of the structure [57,58].

203

204 **Fig 3. Three-dimensional octahedron tensegrity model.** Ligament fibroblast cytoskeleton  
 205 tensegrity structure.

206 The cell elastic modulus measured by AFM may elucidate the changes in cytoskeleton  
 207 elasticity [50,59]. Hence, the elastic modulus median and the mean height values for treated cells  
 208 and the control group were taken from the AFM results as input parameters for the tensegrity  
 209 structure to calculate the harmonic vibration and perform the modal analysis for every cytoskeleton  
 210 configuration in each group. The data for the Poisson's ratio, length, and beam radius of the  
 211 tensegrity structure were taken from the literature. These values are provided in Table 2 [60–63].

212 **Table 2. Cytoskeleton filament material characteristics.** The elastic modulus and  
 213 height were taken from the AFM results obtained for both treatment groups and the control  
 214 group. The Poisson's ratio, length, and beam radius were taken from the literature.

215

|                                            |                       | Actin | Intermediate<br>Filaments | Microtubules |
|--------------------------------------------|-----------------------|-------|---------------------------|--------------|
| Median elastic<br>modulus (Pa)<br>from AFM | 1.0 W/cm <sup>2</sup> | 1085  |                           |              |
|                                            | 2.0 W/cm <sup>2</sup> | 970   |                           |              |
|                                            | Control               | 1399  |                           |              |
| Mean height<br>(µm) from<br>AFM            | 1.0 W/cm <sup>2</sup> | 4.6   |                           |              |
|                                            | 2.0 W/cm <sup>2</sup> | 3.1   |                           |              |
|                                            | Control               | 2.7   |                           |              |

|                                                   |                         |                         |                         |
|---------------------------------------------------|-------------------------|-------------------------|-------------------------|
| Length of the contact radius<br>( $\mu\text{m}$ ) | 11.2                    |                         |                         |
| Poisson's ratio                                   | $0.4 \pm 0.08$          | $0.5 \pm 0.05$          | $0.36 \pm 0.06$         |
| Beam radius (m)                                   | $2 \times 10^{-9}$ [63] | $5 \times 10^{-6}$ [62] | $8 \times 10^{-9}$ [63] |

216

217

218

219

220

221

222

223

224

The units were converted to microscale. The cytoskeleton filaments were considered isotropic and elastic because the cells had small deformations of 2–8% [57,63–65]. The beam length of the contact radius in the tensegrity structure was 11.2  $\mu\text{m}$  [63]. The filament density was  $1.15 \times 10^{-6} \mu\text{g}/\mu\text{m}^3$  [7]. The initial boundary conditions were imposed on the three base nodes of the tensegrity structure [63]. The three receptor nodes represented the focal adhesion of the cell to the ECM because ligament fibroblasts are adherent cells and are dependent on the actin cytoskeleton [66]. They were constrained for three degrees of freedom ( $U1 = U2 = U3 = UR1 = UR2 = UR3 = 0$ ).

225

226

227

228

The height values (Y axes) for each octahedron structure were taken from the mean values obtained in the AFM force–volume topography maps, and the X and Z axes values were taken from the literature to comply with the spread shape of an adherent cell [63,67].

229

## **Fibroblast viability measured using flow cytometry**

230

231

232

233

234

Fluorescein isothiocyanate (FITC)-conjugated Annexin-V (ab14085) and cationic marker propidium iodide (PI- ab14083) were used to quantitate non-apoptotic cells, cells in early apoptosis, necrotic cells, and cells in late apoptosis post-treatment [68]. Samples were analyzed using a flow cytometer (BD FACS Canto II) with a solid-state (L1) laser (488 nm excitation line, air-cooled, 20 mW solid state).

235 Fibroblasts ( $2.84 \times 10^4$  cells per group) were cultured in a six-well plate until 100%  
236 confluency was attained on the 6<sup>th</sup> day. One well was stained with Annexin V-FITC, another with  
237 PI, and the third with both. The other wells served as controls. The samples were placed in  
238 cytometry tubes and diluted in 300  $\mu$ L of the culture medium. Each well corresponded to a specific  
239 sample. Ten thousand events were recorded to identify non-apoptotic cells (Q3: Annexin V-FITC  
240 negative/PI negative), early apoptotic cells (Q4: Annexin V-FITC positive/PI negative), necrotic  
241 cells (Q1: Annexin V-FITC negative/PI positive), and late apoptotic cells (Q2: Annexin V-FITC  
242 positive/PI positive) [69].

243

## 244 **Fibroblast cell proliferation by MTS assay**

245 An MTS tetrazolium assay (MTS=3-(4,5-dimethylthiazol-2-yl)-5-(3-  
246 carboxymethoxyphenyl)-2-(4-sulfophenyl)-2H-tetrazolium, inner salt) [70] measures the  
247 interaction between viable cells (mitochondrial enzymatic activity) and phenazine methosulfate.  
248 This interaction generates a formazan product that is soluble in culture media to count the increased  
249 number of viable fibroblast cells [71–73]. We quantified the number of viable fibroblast cells in  
250 proliferation on the 1<sup>st</sup> and 3<sup>rd</sup> day of the stimulation period and on the 6<sup>th</sup> day after the stimulation  
251 period.

252 Ligament fibroblasts from each treatment group were cultured in a single 96-well plate ( $4 \times$   
253  $10^1$  cells/well) containing 200  $\mu$ L of culture medium until 100% confluency was achieved on the  
254 6<sup>th</sup> day. We divided the 96-well plate into six groups of nine wells ( $3 \times 3$  wells). The remaining  
255 wells served as blank controls, in which only a culture medium with no cells was added. Twenty  
256 microliters of reagent was added directly to each well plate following the instructions of the MTS  
257 Cell Proliferation Assay Kit (colorimetric ab197010, abcam®). The culture plate was incubated  
258 for 3 h at 37°C in a humidified atmosphere containing 5% CO<sub>2</sub>. Absorbance at 490 nm was

259 measured using a microplate reader. The mean absorbance was calculated by subtracting the  
260 absorbance of the treatment groups from the absorbance of the blank controls.

261

## 262 **Fibroblast cell migration measured by scratch assay**

263 We seeded  $50 \times 10^3$  cells in a 12-well plate to fully cover the surface after finishing the  
264 treatment (6<sup>th</sup> day). We used an *in vitro* scratch assay as described by Liang et al. to measure  
265 ligament fibroblast migration [74]. The culture medium lacking FBS was changed post-treatment  
266 to avoid cell division. Each well of the plate was scratched using a 10  $\mu$ L tip. Images at 0 and 24  
267 h (when fibroblast migration closed the scratch for each group) of post-treatment were captured  
268 using a Cytation 3 Cell Imager Multi-Mode Reader (Biotek) and processed using Gen 5.2.0.7  
269 software (Biotek).

270 The measurements of migration were single-blinded. Six migration measurements were  
271 registered with respect to a vertical line located at the center of the image along with each cell  
272 distance (1 pixel equivalent to 1  $\mu$ m). We measured the distance that every cell moved (mean  
273 value) by calculating the difference between two measurements. Next, we compared the beginning  
274 (0 h) to the end of the 24 h period of migration using ImageJ software version 1.50i 3 for Windows  
275 (developed by Wayne Rasband, National Institutes of Health, USA, <http://imagej.nih.gov/ij>).

276

## 277 **Fibroblast ECM synthesis: type I collagen, type III collagen, and** 278 **fibronectin measured by ELISA**

279 Ligament fibroblasts from both treatment groups and the control group were cultured in three  
280 separate six-well plates ( $1.8 \times 10^3$  cells/well) containing 1 mL of culture medium until 100%  
281 confluency was reached on the 6<sup>th</sup> day. Only three of the six wells were seeded in the third plate

282 where control Group C was cultured. We used ELISA to measure the protein concentration of type  
283 I collagen, type III collagen, and fibronectin in ligament fibroblast supernatants on the 6<sup>th</sup> and 10<sup>th</sup>  
284 day after the stimulation period [75,76]. On the 10<sup>th</sup> day, we evaluated the protein concentration  
285 because type I collagen requires more days to be released than type III collagen. Between the 6<sup>th</sup>  
286 and the 10<sup>th</sup> day, the cells were maintained under aseptic conditions in a 1:1 mixture of DMEM/F12  
287 (DF-041-B; Merck Millipore) supplemented with 1% antibiotic/antifungal (15240062; Gibco) and  
288 10% FBS (12657029; Gibco). All cell culture supernatant samples (1 mL) were collected on the  
289 6<sup>th</sup> and 10<sup>th</sup> day, then stored at 4°C and assayed within 7 days.

290 We used rat collagen type I (E-EL-R0233), rat collagen type III (E-EL-R0235), and rat  
291 fibronectin (E-EL-R0578) Elabscience® ELISA kits. Eight serial dilutions were performed using  
292 the reference standard from the kit until the protein reached 20 ng/mL. Then, we collected a  
293 duplicate sample of each dilution, and 16 samples were transferred to a 96-well ELISA plate. The  
294 culture medium (100 µL/well) from both treatment (6 samples) and control (3 samples) groups on  
295 the 6<sup>th</sup> and 10<sup>th</sup> day was aspirated and transferred to a 96-well ELISA plate (a total of 30 samples).  
296 We added a duplicate blank control (100 µL/well of the standard working solution of the  
297 substratum) and a duplicate negative control (100 µL/well of the supplemented cell culture  
298 medium and no cells) to the 96-well ELISA plate.

299 The readings of the wells that contained the samples of the treatment and control groups,  
300 blanks, and negatives were obtained using a microplate reader (absorbance of 450 nm). The  
301 reading of the negative control was subtracted from the readings of the treatment and control  
302 groups to obtain the final optical density (OD) of the samples. A curvilinear regression line was  
303 constructed using the standard to calculate the protein concentration. In total, six samples from the  
304 treatment groups and three from the control group were measured. When the concentrations were  
305 less than the lowest value of the standard curve, the protein concentration (ng/mL) was not detected



306 in one sample from treatment Group A on the 10<sup>th</sup> day, in three samples of treatment Group B on  
307 the 6<sup>th</sup> day, and in two samples of control Group C on the 6<sup>th</sup> day.

308

## 309 **$\beta$ -actin expression measured by immunofluorescence imaging**

310 To demonstrate that ligament fibroblasts activate their cytoskeleton after treatment, we  
311 assessed the presence of  $\beta$ -actin filaments, an essential component of the fibroblast cytoskeleton  
312 [77]. Treated ligament fibroblasts cultured on coverslips were fixed with 4% formaldehyde,  
313 permeabilized using 0.1% Triton, stained with a monoclonal antibody (Invitrogen, 15G5A11/E2)  
314 against rat  $\beta$ -actin at a dilution of 1:2000, and incubated overnight at 4°C. Afterward, the cells  
315 were incubated with 488-conjugated goat anti-mouse IgG secondary antibody (Invitrogen,  
316 A32723) at a dilution of 1:1000 conjugated with Invitrogen Alexa Fluor®. Finally, nuclei were  
317 stained with Hoechst 33342. Images were taken on a cell imaging reader microscopy (Cytation 3  
318 cell imager multi-mode reader; Biotek).

319 We calculated the shortening area of  $\beta$ -actin in each image corresponding to each treatment  
320 group. Then, we analyzed three images per group using the immunohistochemistry (IHC) image  
321 analysis toolbox plugin in ImageJ software version 1.50i 3 for Windows (developed by Wayne  
322 Rasband, National Institutes of Health, USA, <http://imagej.nih.gov/ij>) by following the live-cell  
323 actin analysis proposed by Hoyle et al. [66]. We trained the algorithm by recording five color  
324 pixels of the images to detect the green color of the  $\beta$ -actin filaments stained with Alexa Fluor®.  
325 The statistical color detection model was then automatically calculated. A total of  $29 \pm 1$  cells per  
326 image were analyzed per group. After generating the detected green area in each image, we  
327 calculated the total area of the  $\beta$ -actin filaments using the following steps. First, we converted the  
328 read-green-blue (RGB) image into an 8-bit grayscale. Then, we adjusted the threshold to select the  
329 entire  $\beta$ -actin green area and converted it to black. (Additional details can be found in the

330 supporting information (S2 File)). Finally, we run the particle analysis by defining the size (zero  
331 to infinity) and circularity (0.0 to 1.0). The results were obtained in micrometers.

332

## 333 **Statistical analyses**

334 Statistical analyses were conducted using BioVinci software version 2.8.5 for Windows  
335 (BioTuring Inc., San Diego California USA, [www.bioturing.com](http://www.bioturing.com)), a software environment for data  
336 visualization, analysis, and machine learning in the life sciences. All data were representatives of  
337 at least three independent experiments. Normality was assessed using the Shapiro–Wilk test,  
338 Pearson chi-square test, one-sample Kolmogorov–Smirnov test, and Jarque–Bera test. Because the  
339 data were not normally distributed, the medians (elastic modulus and ECM synthesis) and means  
340 (fibroblast cell proliferation and migration) were compared across groups using a nonparametric  
341 multiple comparison Kruskal–Wallis test. The data were presented as means and standard errors  
342 of the means (SEMs) for the cell proliferation, cell migration, and  $\beta$ -actin area. Then, they were  
343 shown as a boxplot with medians for elastic modulus, harmonics, and ECM synthesis. Statistical  
344 significance was assumed at  $P < 0.05$ .

345

## 346 **Results**

### 347 **Ligament fibroblasts**

348 The ligament fibroblasts were motile around the explanted tissue (Fig 4A) and then adhered to the  
349 flasks where they proliferated. The typical characteristics of fibroblasts (Fig 4B), namely,  
350 adherence; presence of nucleus and body; flat, elongated, and triangular shape; and linkage  
351 between cells, were evident [78].

352

353 **Fig 4. Ligament fibroblasts.** (A) After 15 days, the ligament fibroblasts were motile around the  
354 ligament explant. (B) Adherent cells were stained with H&E.

355

## 356 **Effect of ultrasound treatment on ligament fibroblast structure**

357 The AFM revealed that the median elastic modulus of the treated ligament fibroblasts decreased  
358 by 22% for the low dose (1.0 W/cm<sup>2</sup>) and 31% for the high dose (2.0 W/cm<sup>2</sup>) compared to that of  
359 the control group. We found significant differences among the groups (\*\*P = 0.00001 × 10<sup>-6</sup>; Fig  
360 5A). Additionally, the ligament fibroblast topography through 3D force–volume maps showed  
361 darker areas for the treated cells than those of the control group (Fig 5B). This means that the  
362 application of low and high doses of therapeutic ultrasound softens the ligament fibroblast  
363 structure. Because the cell structure is mainly provided by the cytoskeleton, we inferred that both  
364 treatments caused a reorganization of the cytoskeleton through β-actin activation, which could  
365 produce cell biological responses such as proliferation, migration, and ECM synthesis, as will be  
366 demonstrated in the next sections.

367

368

369 **Fig 5. Softening of ligament fibroblast structure due to low and high doses of ultrasound.** (A)  
370 Boxplot showing medians with whiskers from minimum to maximum values. (B) 3D force–  
371 volume topography maps from AFM results.

372

373

374

## 375 **Effect of ultrasound treatment on harmonic vibration**

376 Using the FEM, we calculated until the 50<sup>th</sup> harmonic of the natural frequency of vibration and  
377 the 50<sup>th</sup> eigenform (mode of vibration) for each cytoskeleton structure. We found similar  
378 displacements of the ligament fibroblast cytoskeleton for the treated cells but a different  
379 displacement for the control group. An example of this finding is illustrated in the 5<sup>th</sup> mode of  
380 vibration (Fig 6A). The displacements for all groups are featured in the animation (S3 Movie). In  
381 terms of the natural frequencies of vibration, higher frequencies were predicted when the  
382 cytoskeleton filaments had a higher elastic modulus (control group), reaching a maximum  
383 vibration frequency of  $4.1 \times 10^9$  Hz in the 50<sup>th</sup> vibration mode. When the cytoskeleton filaments  
384 had the elastic modulus of treatment Groups A and B from the AFM results, the vibration  
385 frequencies decreased up to a maximum of  $3.3 \times 10^9$  Hz in the 50<sup>th</sup> vibration mode for both  
386 structures (Fig 6B). The median of the 50<sup>th</sup> harmonic of the natural frequencies of vibration of  
387 the treated ligament fibroblasts decreased by 13% for the low dose ( $1.0 \text{ W/cm}^2$ ) and 17% for the  
388 high dose ( $2.0 \text{ W/cm}^2$ ) compared to that of the control group. Nevertheless, there was no  
389 statistically significant difference among the groups ( $P = 0.514$ ). It means that harmonic of the  
390 natural frequencies of vibration are not dependent on the elastic modulus decreased by the  
391 dosage of ultrasound treatment.

392

393

394 **Fig 6. Alteration of ligament fibroblast cytoskeleton due to ultrasound treatment.** (A) 3D  
395 tensegrity structure for ligament fibroblast cytoskeleton. (B) Boxplot showing medians with  
396 whiskers from minimum to maximum values.

397

## 398 **Effect of ultrasound treatment on viability of ligament fibroblasts**

399 Histograms from the cell death assays indicated the number of cells stained with Annexin V-FITC  
400 and/or PI (Fig 7A). Flow cytometry showed that most cells were viable in the treatment and control  
401 groups (Fig 7B). The number of events collected was 10,000. The results showed that cell viability  
402 slightly decreased by 1% for the low dose (1.0 W/cm<sup>2</sup>) and 10% for the high dose (2.0 W/cm<sup>2</sup>)  
403 compared to that of the control group.

404

405

406 **Fig 7. Negligible effect of low and high doses of ultrasound on viability of ligament**  
407 **fibroblasts.** (A) Histogram and dot plot of cell viability assay using Annexin V-FITC and cationic  
408 marker PI. Quartile 1: necrotic cells; Q2: late apoptotic cells; Q3: viable cells; and Q4: early  
409 apoptotic cells. (B) Bar plot of the mean number of events for each quartile of the flow cytometry  
410 data.

## 411 **Effect of ultrasound on fibroblast cell proliferation in early**

### 412 **treatment**

413 The MTS assay showed that on the 1<sup>st</sup> day of culture, cell proliferation increased by 25% for the  
414 low dose (1.0 W/cm<sup>2</sup>) compared to that of the control group. On the 3<sup>rd</sup> day of culture, the same  
415 experiment showed that cell proliferation decreased by 11% for the low dose and 9% for the high  
416 dose (2.0 W/cm<sup>2</sup>) compared to that of the control group. On the 6<sup>th</sup> day of culture (1<sup>st</sup> post-treatment  
417 day), cell proliferation increased by 10% for the low dose but decreased by 13% for the high dose

418 compared to that of the control group. We found significant differences among the groups (\*P =  
419 0.041; Fig 8). We demonstrated that a low ultrasound dose increases the cell proliferation of  
420 ligament fibroblasts on the 6<sup>th</sup> day after the stimulation period.

421

422

423 **Fig 8. Increase in fibroblast cell proliferation in early treatment due to low dose of**  
424 **ultrasound.** The mean of cell number in proliferation of ligament fibroblasts is higher for the  
425 low dose on the 6<sup>th</sup> day after treatment. Error bars indicate SEMs.

426

427 **Effect of therapeutic ultrasound on fibroblast cell migration in early**  
428 **treatment**

429 The scratch assay (Fig 9A) showed that the mean migration length of ligament fibroblasts  
430 increased by 4% for the low dose (1.0 W/cm<sup>2</sup>) and decreased by 11% for the high dose (2.0 W/cm<sup>2</sup>)  
431 compared to that of the control group after 24 h. We found significant differences among the  
432 groups (\*\*P = 0.00003 × 10<sup>-4</sup>; Fig 9B). A total of 102, 102, and 107 images were obtained for  
433 the treatment groups (A and B) and control group (C), respectively. Twenty images from Group  
434 A were excluded because of their poor quality. We analyzed 494 measurements from Group A,  
435 613 from Group B, and 641 from Group C.

436

437

438 **Fig 9. Effect of therapeutic ultrasound on fibroblast cell migration in early treatment.** (A)  
439 Scratch assay results for the low dose treatment Group A (1.0 W/cm<sup>2</sup>), high dose treatment Group

440 B (2.0 W/cm<sup>2</sup>), and control Group C. (B) Mean migration length ( $\mu$ m) 24 h after treatment. Error  
441 bars represent SEMs.

442

443 **Effect of therapeutic ultrasound on the OD of ECM: type I collagen,**  
444 **type III collagen, and fibronectin synthesis for early and late**  
445 **treatments**

446

447 Therapeutic ultrasound significantly increased the median OD among groups of type I collagen  
448 (\*P = 0.03), type III collagen (\*P = 0.02), and fibronectin (\*\*P = 0.003) on the 6<sup>th</sup> day. Compared  
449 to the control group on the 6<sup>th</sup> day after the stimulation period, the low dose of ultrasound increased  
450 the OD of the three proteins: type I collagen by 27%; type III collagen by 59%; and fibronectin by  
451 32%. In contrast, compared to the control group on the 6<sup>th</sup> day after the stimulation period, the  
452 high dose of ultrasound increased the OD of both collagens (type I collagen by 57%; type III  
453 collagen by 79%) but decreased fibronectin by 83%. Compared to the control group on the 10<sup>th</sup>  
454 day after the stimulation period, the low dose of ultrasound increased the OD of both collagens  
455 (type I collagen by 8%; type III collagen by 37%) but decreased fibronectin by 57%. In contrast,  
456 compared to the control group on the 10<sup>th</sup> day after the stimulation period, the high dose of  
457 ultrasound increased the OD of the three proteins: type I collagen by 32%; type III collagen by  
458 51%; and fibronectin by 31% (Fig 10).

459

460

461 **Fig 10. Increase in the optical density (OD) of extracellular matrix (ECM) for early and late**  
462 **treatments due to therapeutic ultrasound.** Protein OD at 450 nm of ligament fibroblasts.

463

464 Therapeutic ultrasound increased the OD and protein concentration of type I collagen, type III  
465 collagen, and fibronectin significantly (\*\*P = 0.005) among the groups on the 6<sup>th</sup> day. Compared  
466 to the control group on the 6<sup>th</sup> day after the stimulation period, the low dose of ultrasound did not  
467 synthesize type I collagen or type III collagen; however, fibronectin was increased by 79%. In  
468 contrast, on the 6<sup>th</sup> day after the stimulation period, the high dose of ultrasound did not synthesize  
469 type I collagen or type III collagen, but decreased fibronectin by 100%. Compared to the control  
470 group on the 10<sup>th</sup> day after the stimulation period, the low dose of ultrasound increased the  
471 concentration of both collagens (type I collagen by 30%; type III collagen by 33%) but decreased  
472 fibronectin by 33%. In contrast, compared to the control group on the 10<sup>th</sup> day after the stimulation  
473 period, the high dose of ultrasound increased the concentration of the three proteins: type I collagen  
474 by 45%; type III collagen by 71%; and fibronectin by 44%.

475 Accordingly, we confirmed that the high dose (2.0 W/cm<sup>2</sup>) of therapeutic ultrasound enhances the  
476 synthesis of structural proteins, such as type I collagen, type III collagen, and adhesive proteins  
477 such as fibronectin, better than the low dose (1.0 W/cm<sup>2</sup>) on the 10<sup>th</sup> day after the stimulation  
478 period. A box plot shows the protein concentration data (Fig 11).

479

480

481 **Fig 11. Increase in the concentration of ECM for early and late treatments due to therapeutic**  
482 **ultrasound.** Protein concentration in cell culture supernatants of ligament fibroblasts. Values were



483 measured on the 6<sup>th</sup> day and 10<sup>th</sup> day after stimulation period for type I collagen, type III collagen,  
484 and fibronectin.

485

## 486 **Effect of therapeutic ultrasound on $\beta$ -actin expression for promoting** 487 **early and late treatments**

488

489 Through immunofluorescence imaging,  $\beta$ -actin (an essential structural protein of the cell  
490 cytoskeleton) was detected in both treated and control ligament fibroblasts. We found that both  
491 doses of therapeutic ultrasound decreased the elastic modulus of ligament fibroblasts, an effect  
492 caused by cytoskeleton reorganization, which was visualized for both treatments in our images  
493 through  $\beta$ -actin expression (Fig 12). The IHC image analysis showed a greater  $\beta$ -actin shortening  
494 area in the treatment groups. Compared to the control group, after the stimulation period, the low  
495 dose of ultrasound increased the mean of the  $\beta$ -actin shortening area by 74%. In contrast,  
496 compared to the control group, after the stimulation period, the high dose of ultrasound increased  
497 the mean of the  $\beta$ -actin shortening area by 31%. Finally, compared to the high dose after the  
498 stimulation period, the low dose of ultrasound increased the mean of the  $\beta$ -actin shortening area  
499 by 63%. Nevertheless, there was no statistically significant difference among the groups ( $P =$   
500 0.373). This result can be explained by the small sample size for all groups ( $n=3$ ). Refer to the  
501 supporting information (S4 File) for additional details.

502

503 **Fig 12. Alteration of  $\beta$ -actin expression to promote early and late treatments due to**  
504 **therapeutic ultrasound.** (A) Immunofluorescence analysis of  $\beta$ -actin (green) and cell nuclei  
505 (blue) in ligament fibroblasts. (B) Mean of  $\beta$ -actin area ( $\text{cm}^2$ ). Error bars indicate SEMs.

506

## 507 **Statistical analysis**

508 Descriptive statistics and multiple comparisons between all groups are presented in the supporting  
509 information (S4 file).

510

## 511 **Discussion**

512 Through a multidisciplinary approach that included an *in vitro* experiment and a computational  
513 simulation, our results demonstrate that conventional doses of therapeutic ultrasound applied for  
514 five days modify the mechanical and biological properties of ligament fibroblasts by altering their  
515 cytoskeleton while maintaining cell viability. More specifically, low ( $1.0 \text{ W/cm}^2$ ) and high ( $2.0$   
516  $\text{W/cm}^2$ ) doses promote cytoskeleton deformation, causing ligament fibroblasts to soften and  
517 triggering cell biological responses related to the early (proliferative) and late (remodeling) stages  
518 of the wound healing process. Overall, our results suggest that ligament fibroblasts reorganize their  
519 cytoskeleton as evidenced by the shortening of the  $\beta$ -actin area [79]. These results are manifested  
520 by the decreased elastic modulus, visible cytoskeleton displacements, and decreased harmonics in  
521 treated cells [80]. Moreover, both doses activate the dynamic role of the cytoskeleton to (i) allow  
522 cells to proliferate and migrate after applying a low dose [81], (ii) increase collagen synthesis to  
523 maintain the resistance of the ECM against the high dose [21,82] and probably restore the fluid

524 volume [79], and (iii) increase the fibronectin synthesis to maintain the cell attached to the surface  
525 while collagen is synthesized in the late stage to preserve the shape and cell architecture [21,82].

526 The elastic modulus differences between both doses of therapeutic ultrasound and the control  
527 group at 1 MHz prove that the resistance required to deform the ligament fibroblast with the AFM  
528 tip is lower for the treated groups. As there are no studies on ligament fibroblasts that can be used  
529 to compare with our results, in epithelial and endothelial cell lines derived from human breast  
530 cancer (MCF-7) and human umbilical vein endothelial cells (HUVEC), low-intensity ultrasound  
531 stimulation for 2 s with a frequency of 20 kHz, applied at two intensities of 0.9 and 1.8 W/cm<sup>2</sup>,  
532 produced more cell membrane permeability (sonoporation) in HUVEC cells by the cavitation  
533 effect of the ultrasound wave, which is attributed to their higher elastic modulus and lower  
534 flexibility caused by more organized actin fibers of the cytoskeleton [13].

535 Another study found a strong relationship between the ultrasound frequency and cell elastic  
536 modulus of breast cancer cells. At a frequency of 450 kHz and 60 s exposure to ultrasound, the  
537 cell elastic modulus initially tended to increase by 50%. However, when the frequencies were in  
538 the range of 550–620 kHz, the cell elastic modulus decreased by 50%. The explanation of this  
539 behavior depends not only on the specific interaction between ultrasound doses that produce  
540 reorganization of the cytoskeleton but also on the cell density, size, and shape, as well as the ability  
541 of cells to detect the stiffness of the neighboring cells and surrounding location [34].

542 Our findings show that ligament fibroblasts treated with both doses of therapeutic ultrasound tend  
543 to be more deformable or flexible but possess the strength to maintain the cell shape without  
544 rupture, which can be explained by the disassemblies induced in actin microfilaments [13].  
545 Although greater dispersion is observed, our experimental elastic modulus results (median values)  
546 are in the range of the NIH3T3 fibroblasts (0.8–5 kPa) [80,83]. This dispersion in the elastic

547 modulus may be influenced by the AFM indentation random procedure, which can include one or  
548 more of the following: cytoskeleton, membrane, and cell organelles.

549 In addition, as the cell structure is mainly provided by the cytoskeleton, we inferred that the cell  
550 elastic modulus may alter the harmonic vibration of the cell protein network of filaments.  
551 Furthermore, while the cytoskeleton filaments had a lower elastic modulus, the natural frequencies  
552 of vibration decreased. These results are in agreement with other studies, which affirm that the  
553 natural frequencies of vibration of normal cells are higher owing to their high elastic modulus  
554 compared to that of tumor cells [7,84]. On the other hand, the frequency values for the cytoskeleton  
555 harmonics differed from the 1 MHz ultrasound frequency. The absence of a resonance effect may  
556 explain cell viability. While our goal was to analyze only the cytoskeleton dynamics, the cytoplasm  
557 and nucleus were excluded from our simulation. This may explain why the values of the natural  
558 frequencies of vibration that we reported ( $3.3 \times 10^9$  to  $4.1 \times 10^9$  Hz) vary from those obtained in  
559 previous studies ( $21\text{--}34 \times 10^3$  Hz for tumor cells) [34]. Another reason may be the differences in  
560 the elastic modulus of ligament fibroblast cells versus tumor cells [85].

561 As both ultrasound treatments did not affect the viability of ligament fibroblasts, we confirmed  
562 that therapeutic ultrasound does not induce harmful effects by cavitation threshold (bubbles  
563 originating in a liquid that interacts with the nearest structure) [37]. In addition, ligament  
564 fibroblasts do not perceive the treatments as a negative stimulation because their level of apoptosis  
565 is comparable to that of the control group cells. Similar to low-intensity pulsed ultrasound,  
566 conventional therapeutic ultrasound at low and high doses is safe and does not affect cell viability  
567 or apoptosis [23].

568 Our results extend the previous findings that fibroblasts treated with ultrasound show increased  
569 fibroblast cell proliferation at  $1.0 \text{ W/cm}^2$  [42,86] and demonstrate that the frequency of ultrasound  
570 is not a unique parameter that affects the cell response, as affirmed by Rubin et al. [37]. Our

571 findings imply that external forces produced by different intensities are a plausible reason for the  
572 increase in cell proliferation through cytoskeletal reorganization. This means that 1.0 W/cm<sup>2</sup> of  
573 ultrasound stimulates the early stage of wound healing caused by ligament fibroblasts.

574 Our results are consistent with those of previous studies on other mammalian cells. For example,  
575 Tsai et al. demonstrated that ultrasound enhances the migration and proliferation of tendon cells  
576 by using doses similar to those in our study [30]. Moreover, Man et al. stated that osteoblast cells  
577 exposed to the same frequency as in our study, but with different intensities and time doses, exhibit  
578 increased cell migration by 40% [87]. Aterthon et al. demonstrated that low-dose ultrasound  
579 treatment enhances the migration speed of osteoblasts (MC3T3) by 30% [88]. Furthermore, Leng  
580 et al. showed that low-dose ultrasound treatment increases relative migration by 150% and  
581 proliferation by 80% in keratinocyte cells by activating signaling pathways [89]. Although our  
582 results have a lower percentage of increased migration than those of other studies, this difference  
583 can be explained by the different cell types chosen in the different cited investigations. Thus, we  
584 suggest that cell proliferation and migration are dependent on the dosage of ultrasound treatment.  
585 These results can be explained by cytoskeleton reorganization, as shown in other studies [23,88],  
586 and by the decrease in the cell elastic modulus of the ligament fibroblasts, as demonstrated in this  
587 study.

588 Our findings regarding collagen synthesis on the 10<sup>th</sup> day after stimulation are consistent with the  
589 observations of Tsai et al., who also found that low intensities of ultrasound (0.1 and 1.0 W/cm<sup>2</sup>)  
590 stimulate the synthesis of type I and type III collagen [90]. In terms of fibronectin synthesis, our  
591 results for the low dose on the 6<sup>th</sup> day after stimulation agree with those of Harle et al., who found  
592 that fibronectin synthesis was upregulated following stimulation with lower intensities of  
593 ultrasound (140 mW/cm<sup>2</sup>) in human osteoblasts. However, for the same low dose, but on the 10<sup>th</sup>  
594 day after stimulation, fibronectin synthesis was diminished as shown with several low intensities

595 of ultrasound (140, 230, 540, and 990 mW/cm<sup>2</sup>) in human periodontal ligament cells [42]. Our  
596 results showed that the synthesis of proteins depends not only on the stimulation dose but also on  
597 the number of days after stimulation, which indicates the importance of selecting the correct dose  
598 of stimulation based on the early or late stage of the ligament healing process. For example, to  
599 increase the synthesis of type I and type III collagen in the remodeling or late stage of wound  
600 healing, we recommend applying a high dose of stimulation and evaluating the results on the 10<sup>th</sup>  
601 day after stimulation.

602 In addition, since collagen was not synthesized on the 6<sup>th</sup> day after stimulation for both the  
603 treatment and control groups but was released on the 10<sup>th</sup> day after stimulation for both doses, we  
604 confirmed that collagen production is a complex process of transcription, translation, and assembly  
605 to obtain this protein in the ECM [91]. Furthermore, these findings suggest that therapeutic  
606 ultrasound may improve the new structural and mechanical ECM of an injured ligament because  
607 collagen provides resistance to the tissue [92].

608 On the other hand, while fibronectin promotes cell adherence to the source surface [93], our results  
609 suggest that the low dose on the 10<sup>th</sup> day after stimulation decreases the synthesis of fibronectin to  
610 avoid ligament fibroblast attachment; the decrease in fibronectin enables cell proliferation and  
611 migration. A high dose on the 10<sup>th</sup> day increases the synthesis of fibronectin to enhance ligament  
612 fibroblast attachment; the increase in fibronectin facilitates synthesis of type I and type III  
613 collagen.

614 Moreover, we infer that the low dose of ultrasound is the treatment that primarily increased the  $\beta$ -  
615 actin shortening area. As shown in living fibroblasts, shortening of stress fibers occurs starting at  
616 the proximal end, which is reflected by a decrease in fluorescence intensity as measured in our  
617 study [94]. On the other hand, the high dose increased the  $\beta$ -actin shortening area to facilitate

618 collagen and fibronectin synthesis, as we previously demonstrated [95]. To our knowledge, no  
619 evidence has been reported about the effects of ultrasound on  $\beta$ -actin expression in ligament  
620 fibroblasts; however, low-intensity pulsed ultrasound promotes actin assembly (polymerization)  
621 by mechanical stress in osteoblasts [96]. It is also important to mention that a high dose decreases  
622 the  $\beta$ -actin shortening area to allow fibroblasts to attach to the ECM and increase collagen  
623 synthesis by actin assembly [95].

624 We focused our attention on the mechanical properties that altered the cytoskeleton dynamics to  
625 determine the biological responses related to the wound healing process after applying low and  
626 high doses of therapeutic ultrasound on ligament fibroblasts. The elastic modulus and harmonics  
627 of the cytoskeleton, such as those observed in cancer cell mechanics, can be used as biomarkers to  
628 determine cell function because the elastic modulus is an indicator of cancer cell invasiveness [85],  
629 and the harmonics can predict scenarios of possible damage to cells as low-frequency ultrasound  
630 induces cytotoxic effects on tumor cells [7]. We propose that the elastic modulus is an indicator of  
631 actin reorganization for cell proliferation, migration, and synthesis of collagen and fibronectin after  
632 applying therapeutic ultrasound doses to ligament fibroblasts, and that harmonics can be a  
633 predictor of cell viability and cytoskeleton deformation. Our findings reveal the reasons for the  
634 relevance of the above-described interactions between the cell mechanics and biological responses  
635 of ligament fibroblasts caused by the application of therapeutic ultrasound waves.

## 636 **Conclusions**

637 Our study introduces a multidisciplinary approach for diagnosing cell function through cell  
638 mechanics analysis in ligaments and hopefully in other dense connective tissues such as the tendon,  
639 fascia, and skin. This study presents a new perspective of cell mechanics in rehabilitation, which  
640 can help researchers engaged in clinical reasoning to formulate specific doses of therapeutic

641 ultrasound that can potentially improve the early and late stages of the ligament wound healing  
642 process.

## 643 **References**

- 644 1. Vicente-Manzanares M. Cell migration at a glance. *J Cell Sci.* 2005;118(21):4917–9.
- 645 2. Springer Nature. Cell migration. © Springer Nature Publishing; [Internet] 2019 [Cited  
646 2019 Nov 12]. Available from: <https://www.nature.com/subjects/cell-migration>.
- 647 3. William E. Prentice. Understanding and Managing the Healing Process Through  
648 Rehabilitation. In: Hoogenboom B, Voight M, Prentice W, editors. *Musculoskeletal  
649 Interventions: Techniques for Therapeutic Exercise.* 3rd ed. New York: McGraw-Hill;  
650 2013.
- 651 4. Nijenhuis N, Zhao X, Carisey A, Ballestrem C, Derby B. Combining AFM and acoustic  
652 probes to reveal changes in the elastic stiffness tensor of living cells. *Biophys J.*  
653 2014;107(7):1502–12.
- 654 5. Nikolaev NI, Müller T, Williams DJ, Liu Y. Changes in the stiffness of human  
655 mesenchymal stem cells with the progress of cell death as measured by atomic force  
656 microscopy. *Biomech.* 2014;47(3):625–30.
- 657 6. Schulze KD, Zehnder SM, Urueña JM, Bhattacharjee T, Sawyer WG, Angelini TE. Elastic  
658 modulus and hydraulic permeability of MDCK monolayers. *J Biomech.* 2017;53:210–3.
- 659 7. Geltmeier A, Rinner B, Bade D, Meditz K, Witt R, Bicker U, et al. Characterization of  
660 dynamic behaviour of MCF7 and MCF10A cells in ultrasonic field using modal and  
661 harmonic analyses. *PLoS One.* 2015;10(8):1–20.
- 662 8. Shekofteh M, Mohseny M, Shahbodaghi A, Zayeri F, Rahimi F. The Correlation among



- 663 Y-Index and Other Scientometric Indicators. *Curr Sci*. 2016 May 1;110(9):1823–8.
- 664 9. Miller D, Smith N, Bailey M, Czarnota G, Hynynen K, Makin I. Overview of therapeutic  
665 ultrasound applications and safety considerations. *J Ultrasound Med*. 2012;31(4):623–34.
- 666 10. O’Brien Jr. WD. Ultrasound-biophysics mechanisms. *Prog Biophys Mol Biol*. 2007  
667 Jan;93(1–3):212–55.
- 668 11. Tole NM. Intensity of ultrasound. In: Ostensen H, editor. *Basic Physics of*  
669 *Ultrasonographic Imaging*. Malta: World health organization; 2005. p. 33–4.
- 670 12. Rodríguez M. Ultrasonidos. In: *Electroterapia en Fisioterapia*. 2a ed. Buenos Aires:  
671 Editorial Médica Panamericana; 2004. p. 515–51.
- 672 13. Khayamian MA, Baniassadi M, Abdolahad M. Monitoring the effect of sonoporation on  
673 the cells using electrochemical approach. *Ultrason Sonochem*. 2018;41:619–25.
- 674 14. Paluch EK, Nelson CM, Biais N, Fabry B, Moeller J, Pruitt BL, et al.  
675 *Mechanotransduction : use the force (s)*. *BMC Biol*. 2015;13(47):1–14.
- 676 15. Tsata V, Beis D. In full force. *Mechanotransduction and morphogenesis during*  
677 *homeostasis and tissue regeneration*. *J Cardiovasc Dev Dis*. 2020;7(40):1–18.
- 678 16. Herrmann H, Bär H, Kreplak L, Strelkov S V, Aebi U. Intermediate filaments: from cell  
679 architecture to nanomechanics. *Nat Rev Mol Cell Biol*. 2007 Jul;8(7):562–73.
- 680 17. Samandari M, Abrinia K, Mokhtari-Dizaji M, Tamayol A. Ultrasound induced strain  
681 cytoskeleton rearrangement: An experimental and simulation study. *J Biomech*.  
682 2017;60:39–47.
- 683 18. Allsop G, Peckham M. *Cytoskeleton and Cell Motility*. *Compr Biotechnol Second Ed*.  
684 2011;1:191–204.

- 685 19. Mizrahi N, Zhou EHH, Lenormand G, Krishnan R, Weihs D, Butler JP, et al. Low  
686 intensity ultrasound perturbs cytoskeleton dynamics. *Soft Matter*. 2012;8(8):2438–43.
- 687 20. Louw TM, Budhiraja G, Viljoen HJ, Subramanian A. Mechanotransduction of Ultrasound  
688 is Frequency Dependent Below the Cavitation Threshold. *Ultrasound Med Biol*.  
689 2013;39(7):1303–19.
- 690 21. Alenghat FJ, Ingber DE. Mechanotransduction: All Signals Point to Cytoskeleton, Matrix,  
691 and Integrins. *Sci STKE*. 2002 Feb 12;(119):pe6.
- 692 22. Tibbitt MW, Anseth KS. Dynamic Microenvironments: The Fourth Dimension. *Sci Transl*  
693 *Med*. 2012 Nov 14;4(160):160ps24 LP-160ps24.
- 694 23. de Lucas B, Pérez LM, Bernal A, Gálvez BG. Ultrasound Therapy: Experiences and  
695 Perspectives for Regenerative Medicine. *Genes (Basel)*. 2020;11(9):1–21.
- 696 24. Oliveira PD De, Oliveira DAAP, Martinago CC, Célia R, Frederico P, Soares CP, et al.  
697 Effect of low-intensity pulsed ultrasound therapy on a fibroblasts cell culture. *Fisioter e*  
698 *Pesqui*. 2015;22(2):112–8.
- 699 25. Bohari SP, Grover LM, Hukins DW. Pulsed low-intensity ultrasound increases  
700 proliferation and extracellular matrix production by human dermal fibroblasts in three-  
701 dimensional culture. *J Tissue Eng*. 2015;6:2041731415615777.
- 702 26. Bertin LD, Poli-Frederico RC, Pires Oliveira DAA, Oliveira PD, Pires FB, Silva AFS, et  
703 al. Analysis of Cell Viability and Gene Expression After Continuous Ultrasound Therapy  
704 in L929 Fibroblast Cells. *Am J Phys Med Rehabil*. 2019;98(5):369–72.
- 705 27. Hormozi-Moghaddam Z, Mokhtari-Dizaji M, Nilforoshzadeh MA, Bakhshandeh M. Low-  
706 intensity ultrasound to induce proliferation and collagen I expression of adipose-derived

- 707 mesenchymal stem cells and fibroblast cells in co-culture. *Meas J Int Meas Confed.*  
708 2021;167(May 2020):108280.
- 709 28. Lennart DJ. Nonthermal effects of therapeutic ultrasound: the frequency resonance  
710 hypothesis. *J Athl Train.* 2002 Jul;37(3):293–9.
- 711 29. Louw TM, Budhiraja G, Viljoen HJ, Subramanian A. Mechanotransduction of Ultrasound  
712 is Frequency Dependent Below the Cavitation Threshold. *Ultrasound Med Biol.*  
713 2013;39(7):1303–19.
- 714 30. Tsai W-C, Chen JY-S, Pang J-HS, Hsu C-C, Lin M-S, Chieh L-W. Therapeutic ultrasound  
715 stimulation of tendon cell migration. *Connect Tissue Res.* 2008 Jan 6;49(5):367–73.
- 716 31. Lepschkin WW, Goldman DE. Effects of ultrasound on cell structure. *J Cell Physiol.*  
717 1952;40(3):383–97.
- 718 32. Iranmanesh I, Ohlin M, Ramachandraiah H, Ye S, Russom A, Wiklund M. Acoustic  
719 micro-vortexing of fluids, particles and cells in disposable microfluidic chips. *Biomed*  
720 *Microdevices.* 2016;18(4):1–7.
- 721 33. Carmine Pappalettere IM, Tachibana K. Effect of Different Ultrasound Frequency Sweep  
722 Pattern on Leukemic Cells. In: *Proceedings of the World Congress on Electrical*  
723 *Engineering and Computer Systems and Science (EECSS 2015).* Barcelona; 2015. p. 1–2.
- 724 34. Ivone M, Lamberti L, Pappalettere C, Caratozzolo MF, Tullo A. Experimental comparison  
725 Of MCF7 And MCF10A response to low intensity ultrasound. *J Mech Med Biol.*  
726 2019;19(6):1–24.
- 727 35. Conneely M, Mcgloin D, Robertson P, Mclean WHI, Campbell P a. Influence of  
728 ultrasound exposure on cell-mechanical properties : A preliminary study on MCF7 human

- 729 breast cancer cells. In: The 15th European Microscopy Congress. Manchester Central:  
730 Journal of Microscopy; 2012.
- 731 36. Izadifar Z, Babyn P, Chapman D. Mechanical and Biological Effects of Ultrasound: A  
732 Review of Present Knowledge. *Ultrasound Med Biol.* 2017;43(6):1085–104.
- 733 37. Rubin D, Anderton N, Smalberger C, Polliack J, Nathan M, Postema M. On the Behaviour  
734 of Living Cells under the Influence of Ultrasound. *Fluids.* 2018;3(4):82.
- 735 38. Jiang YY, Park JK, Yoon HH, Choi H, Kim CW, Seo YK. Enhancing Proliferation and  
736 ECM Expression of Human ACL Fibroblasts by Sonic Vibration. *Prep Biochem*  
737 *Biotechnol.* 2015;45(5):476–90.
- 738 39. Henshaw DR, Attia E, Bhargava M, Hannafin JA. Canine ACL Fibroblast Integrin  
739 Expression and Cell Alignment in Response to Cyclic Tensile Strain in Three-  
740 Dimensional. *J Orthop Res.* 2006;24(3):481–90.
- 741 40. Karlsson LK, Junker JPE, Grenegård M, Kratz G. Human Dermal Fibroblasts: A Potential  
742 Cell Source for Endothelialization of Vascular Grafts. *Ann Vasc Surg.* 2009;23(5):663–  
743 74.
- 744 41. Spitalnik P. *Histology laboratory manual 2015-2016.* 2015.
- 745 42. Harle J, Salih V, Mayia F, Knowles J, Olsen I. Effects of ultrasound on the growth and  
746 function of bone and periodontal ligament cells in vitro. *Ultrasound Med Biol.* 2001  
747 *Apr*;27(4):579–86.
- 748 43. Carrer V de M, Setti JAP, Veronez D da L, Moser AD. Continuous therapeutic ultrasound  
749 in the healing process in rat skin. *Fisioter em Mov.* 2015;28(4):751–8.
- 750 44. Uhlemann C, Heinig B, Wollina U. Therapeutic ultrasound in lower extremity wound

- 751 management. *Int J Low Extrem Wounds*. 2003 Sep;2(3):152–7.
- 752 45. Ng CO., Ng GY., See EK., Leung MC. Therapeutic ultrasound improves strength of  
753 achilles tendon repair in rats. *Ultrasound Med Biol*. 2003 Oct;29(10):1501–6.
- 754 46. Robertson VJ, Baker KG. A review of therapeutic ultrasound: effectiveness studies. *Phys*  
755 *Ther*. 2001;81:1339–50.
- 756 47. Warden SJ, Avin KG, Beck EM, DeWolf ME, Hagemeyer MA, Martin KM. Low-intensity  
757 pulsed ultrasound accelerates and a nonsteroidal anti-inflammatory drug delays knee  
758 ligament healing. *Am J Sports Med*. 2006;34(7):1094–102.
- 759 48. Baker KG, Robertson VJ, Duck F a. A review of therapeutic ultrasound: biophysical  
760 effects. Vol. 81, *Phys Ther*. 2001. p. 1351–8.
- 761 49. Vernon MM, Lewin MB. Fetal and Neonatal Echocardiography. *Avery’s Dis Newborn*.  
762 2018 Jan 1;779–89.
- 763 50. Chen J. Nanobiomechanics of living cells: a review. *Interface Focus*.  
764 2014;4(2):20130055–20130055.
- 765 51. Solon J, Levental I, Sengupta K, Georges PC, Janmey PA. Fibroblast adaptation and  
766 stiffness matching to soft elastic substrates. *Biophys J*. 2007;93(12):4453–61.
- 767 52. Guz N, Dokukin M, Kalaparthy V, Sokolov I. If Cell Mechanics Can Be Described by  
768 Elastic Modulus: Study of Different Models and Probes Used in Indentation Experiments.  
769 *Biophys J*. 2014;107(3):564–75.
- 770 53. Managuli V, Roy S. Asymptotical Correction to Bottom Substrate Effect Arising in AFM  
771 Indentation of Thin Samples and Adherent Cells Using Conical Tips. *Exp Mech*. 2018;1–  
772 9.

- 773 54. Pegoraro AF, Janmey P, Weitz DA. Mechanical properties of the cytoskeleton and cells.  
774 Cold Spring Harb Perspect Biol. 2017;9(11).
- 775 55. Barreto S, Lacroix D. Quantification of CSK Mechanics and Deformation in Relation to  
776 Cellular Functioning. In: Multiscale Mechanobiology in Tissue Engineering. Singapore:  
777 Springer Singapore; 2019. p. 181–93.
- 778 56. Ingber DE. Tensegrity I . Cell structure and hierarchical systems biology. J Cell Sci.  
779 2003;116(7):1157–73.
- 780 57. Ananthakrishnan R, Guck J, Wottawah F, Schinkinger S, Lincoln B, Romeyke M, et al.  
781 Quantifying the contribution of actin networks to the elastic strength of fibroblasts. J  
782 Theor Biol. 2006;242:502–16.
- 783 58. Alberts B, Johnson A, Lewis J. The self-assembly and dynamic structure of cytoskeletal  
784 filaments. In: Molecular Biology of the Cell. 4th ed. New York: Garland Science; 2002.
- 785 59. Hoh JH, Schoenenberger C a. Surface morphology and mechanical properties of MDCK  
786 monolayers by atomic force microscopy. J Cell Sci. 1994;107(Pt 5):1105–14.
- 787 60. Jacobs CR, Huang H, Kwon RY. Introduction to Cell Mechanics and Mechanobiology. 1st  
788 ed. New York: Garland Science; 2012. 350 p.
- 789 61. Ofek G, Wiltz DC, Athanasiou KA. Contribution of the Cytoskeleton to the Compressive  
790 Properties and Recovery Behavior of Single Cells. Biophys J. 2009;97(7):1873–82.
- 791 62. Guilak F, Haider MA, Setton LA, Laursen T, Baaijens FPT. Multiphasic models of cell  
792 mechanics Farshid. In: Mofrad MRK, Kamm RD, editors. Cytoskeletal mechanics Models  
793 and measurements. New York: Cambridge University Press; 2006. p. 256.
- 794 63. MCGARRY JG, PRENDERGAST PJ. A three-dimensional finite element model of an adherent

- 795 eukaryotic cell. *Eur Cells Mater.* 2004;7:27–34.
- 796 64. Palmer JS, Boyce MC. Constitutive modeling of the stress–strain behavior of F-actin  
797 filament networks. *Acta Biomater.* 2008;4:597–612.
- 798 65. Unterberger MJ, Schmoller KM, Bausch AR, Holzapfel GA. A new approach to model  
799 cross-linked actin networks: Multi-scale continuum formulation and computational  
800 analysis. *J Mech Behav Biomed Mater.* 2013 Jun 1;22:95–114.
- 801 66. Hoyle NP, Seinkmane E, Putker M, Feeney KA, Krogager TP, Chesham JE, et al.  
802 Circadian actin dynamics drive rhythmic fibroblast mobilization during wound healing.  
803 *Sci Transl Med.* 2017 Nov 8;9(415):1–10.
- 804 67. Chen T, Wu C, Tang M, Huang J, Su F. Complexity of the Tensegrity Structure for  
805 Dynamic Energy and Force Distribution of Cytoskeleton during Cell Spreading. *PLoS*  
806 *One.* 2010;5(12):1–11.
- 807 68. Span LFR, Pennings AHM, Vierwinden G, Boezeman JBM, Raymakers RAP, de Witte T.  
808 The dynamic process of apoptosis analyzed by flow cytometry using Annexin-  
809 V/propidium iodide and a modified in situ end labeling technique. *Cytometry.*  
810 2002;47(1):24–31.
- 811 69. Hingorani R, Deng J, Elia J, McIntyre C, Mittar D. Detection of Apoptosis Using the BD  
812 Annexin V FITC Assay on the BD FACSVerse™ System. BD Biosciences. 2011.
- 813 70. Capasso JM, Cossío BR, Berl T, Rivard CJ, Jiménez C. A colorimetric assay for  
814 determination of cell viability in algal cultures. *Biomol Eng.* 2003 Jul 1;20(4–6):133–8.
- 815 71. Yadav K, Singhal N, Rishi V, Yadav H. *Cell Proliferation Assays.* eLS John Wiley Sons,  
816 Ltd Chichester. 2014;

- 817 72. Kuete V, Karaosmanoğlu O, Sivas H. Anticancer Activities of African Medicinal Spices  
818 and Vegetables. In: Medicinal Spices and Vegetables from Africa: Therapeutic Potential  
819 Against Metabolic, Inflammatory, Infectious and Systemic Diseases. Elsevier Inc.; 2017.  
820 p. 271–97.
- 821 73. McGowan EM, Alling N, Jackson EA, Yagoub D, Haass NK, Allen JD, et al. Evaluation  
822 of cell cycle arrest in estrogen responsive MCF-7 breast cancer cells: Pitfalls of the MTS  
823 assay. PLoS One. 2011;6(6):1–8.
- 824 74. Liang C-C, Park AY, Guan J-L. In vitro scratch assay: a convenient and inexpensive  
825 method for analysis of cell migration in vitro. Nat Protoc. 2007;2(2):329–33.
- 826 75. Gay S, Vijanto J, Raekallio J, Penttinen R. Collagen types in early phases of wound  
827 healing in children - PubMed. Acta Chir Scand. 1978;144(4):205–11.
- 828 76. Xue M, Jackson CJ. Extracellular Matrix Reorganization During Wound Healing and Its  
829 Impact on Abnormal Scarring. Adv Wound Care. 2015;4(3):119–36.
- 830 77. Dugina V, Zwaenepoel I, Gabbiani G, Clement S, Chaponnier C.  $\beta$ - and  $\gamma$ -Cytoplasmic  
831 Actins Display Distinct Distribution and Functional Diversity. J Cell Sci.  
832 2009;122(16):2980–8.
- 833 78. Abercrombie M. Fibroblasts. J Clin Pathol. 1978;12:1–6.
- 834 79. Langevin HM, Nedergaard M, Howe AK. Cellular control of connective tissue matrix  
835 tension. J Cell Biochem. 2013;114(8):1714–9.
- 836 80. Pastrana HF, Cartagena-Rivera AX, Raman A, Ávila A. Evaluation of the elastic Young's  
837 modulus and cytotoxicity variations in fibroblasts exposed to carbon-based nanomaterials.  
838 J Nanobiotechnology. 2019;17(1):1–15.



- 839 81. Tavares S, Vieira AF, Taubenberger AV, Araújo M, Martins NP, Brás-Pereira C, et al.  
840 Actin stress fiber organization promotes cell stiffening and proliferation of pre-invasive  
841 breast cancer cells. *Nat Commun.* 2017;8(15237).
- 842 82. Hurtley SM. *Cell Biology of the Cytoskeleton.* Science (80- ). 1998;279(5350):459.
- 843 83. Efremov YM, Shpichka AI, Kotova SL, Timashev PS. Viscoelastic mapping of cells  
844 based on fast force volume and PeakForce Tapping. *Soft Matter.* 2019;15(27):5455–63.
- 845 84. Jaganathan, Saravana Kumar Subramanian AP, Vellayappan MV, Balaji A, Aruna John A,  
846 Jaganathan AK, Supriyanto E. Natural frequency of cancer cells as a starting point in  
847 cancer treatment. *Curr Sci.* 2016;110(9):1828–32.
- 848 85. Azadi S, Tafazzoli-Shadpour M, Soleimani M, Warkiani ME. Modulating cancer cell  
849 mechanics and actin cytoskeleton structure by chemical and mechanical stimulations. *J*  
850 *Biomed Mater Res - Part A.* 2019;107(8):1569–81.
- 851 86. Doan N, Reher P, Meghji S, Harris M. In vitro effects of therapeutic ultrasound on cell  
852 proliferation, protein synthesis, and cytokine production by human fibroblasts, osteoblasts,  
853 and monocytes. *J Oral Maxillofac Surg.* 1999 Apr;57(4):409–19.
- 854 87. Man J, Shelton RM, Cooper PR, Landini G, Scheven B a. Low intensity ultrasound  
855 stimulates osteoblast migration at different frequencies. *J Bone Miner Metab.* 2012  
856 Sep;30(5):602–7.
- 857 88. Atherton P, Lausecker F, Harrison A, Ballestrem C. Low-intensity pulsed ultrasound  
858 promotes cell motility through vinculin-controlled Rac1 GTPase activity. *J Cell Sci.*  
859 2017;130(14):2277–91.
- 860 89. Leng X, Shang J, Gao D, Wu J. Low-intensity pulsed ultrasound promotes proliferation

- 861 and migration of HaCaT keratinocytes through the PI3K / AKT and JNK pathways.  
862 Brazilian J Med Biol Res. 2018;51(12):1–8.
- 863 90. Tsai W-C, Pang J-HS, Hsu C-C, Chu N-K, Lin M-S, Hu C-F. Ultrasound Stimulation of  
864 Types I and III Collagen Expression of Tendon Cell and Upregulation of Transforming  
865 Growth Factor b. J Orthop Res. 2006;24:1310–6.
- 866 91. Kuivaniemi H, Tromp G. Type III collagen (COL3A1): Gene and protein structure, tissue  
867 distribution, and associated diseases. Gene. 2020;707:151–71.
- 868 92. Makareeva E, Leikin S. Collagen Structure, Folding and Function. Osteogenesis  
869 Imperfecta: A Translational Approach to Brittle Bone Disease. Elsevier Inc.; 2013. 71–84  
870 p.
- 871 93. Parisi L, Toffoli A, Ghezzi B, Mozzoni B, Lumetti S, Macaluso GM. A glance on the role  
872 of fibronectin in controlling cell response at biomaterial interface. Jpn Dent Sci Rev.  
873 2020;56(1):50–5.
- 874 94. Wang YL. Reorganization of actin filament bundles in living fibroblasts. J Cell Biol.  
875 1984;99(4 I):1478–85.
- 876 95. Qin Z, Fisher GJ, Voorhees JJ, Quan T. Actin cytoskeleton assembly regulates collagen  
877 production via TGF- $\beta$  type II receptor in human skin fibroblasts. J Cell Mol Med.  
878 2018;22(9):4085–96.
- 879 96. Nishida T, Kubota S, Aoyama E, Yamanaka N, Lyons KM, Takigawa M. Low-intensity  
880 pulsed ultrasound (LIPUS) treatment of cultured chondrocytes stimulates production of  
881 CCN family protein 2 (CCN2), a protein involved in the regeneration of articular  
882 cartilage: mechanism underlying this stimulation. Osteoarthr Cartil. 2017;25(5):759–69.



884

## Author Contributions

885

The contributions made by each author to the manuscript are presented in Table 3.

886

**Table 3. Contributions made by each author to the manuscript.**

|                        | Elastic modulus              | Harmonics        | Cell viability | Cell proliferation | Cell migration   | ECM synthesis    | $\beta$ -actin expression |
|------------------------|------------------------------|------------------|----------------|--------------------|------------------|------------------|---------------------------|
| Conceptualization      | (CS), (PR), (AB), (RM), (GA) | (CS), (RM), (GA) | (CS)           | (CS)               | (CS), (OM)       | (CS), (NJ)       | (CS), (OM)                |
| Data curation          | (CS), (PR)                   | (CS), (RM), (GA) | (CS)           | (CS)               | (CS), (OM)       | (CS), (NJ)       | (CS), (OM)                |
| Formal analysis        |                              |                  |                |                    |                  |                  |                           |
| Investigation          |                              |                  |                |                    |                  |                  |                           |
| Methodology            |                              |                  |                |                    |                  |                  |                           |
| Funding acquisition    | (CS), (PR), (AB), (GA)       | (CS), (GA)       | (CS), (GA)     | (CS), (GA)         | (CS), (OM), (GA) | (CS), (NJ), (GA) | (CS), (OM), (GA)          |
| Project administration | (CS), (GA)                   | (CS), (GA)       | (CS), (GA)     | (CS), (GA)         | (CS), (GA)       | (CS), (GA)       | (CS), (GA)                |
| Resources              | (CS), (PR), (AB), (GA)       | (CS), (GA)       | (CS), (GA)     | (CS), (GA)         | (CS), (OM), (GA) | (CS), (NJ), (GA) | (CS), (OM), (GA)          |
| Software               |                              |                  |                |                    |                  |                  |                           |
| Supervision            | (AB), (GA), (RM)             | (AB), (GA), (RM) | (AB), (GA)     | (AB), (GA)         | (AB), (GA), (OM) | (AB), (GA), (NJ) | (AB), (GA), (OM)          |

|                               |                                          |                           |                                 |                           |                                 |                                 |                                 |
|-------------------------------|------------------------------------------|---------------------------|---------------------------------|---------------------------|---------------------------------|---------------------------------|---------------------------------|
| Validation                    | (CS),<br>(PR),<br>(AB),<br>(RM),<br>(GA) | (CS), (AB),<br>(RM), (GA) | (AB),<br>(GA)                   | (AB), (GA)                | (AB),<br>(GA),<br>(OM)          | (AB),<br>(GA),<br>(NJ)          | (AB),<br>(GA),<br>(OM)          |
| Visualization                 | (CS), (PR)                               | (CS), (RM),<br>(GA)       | (CS)                            | (CS)                      | (CS),<br>(OM)                   | (CS),<br>(NJ)                   | (CS),<br>(OM)                   |
| Writing – original<br>draft   | (CS), (PR)                               | (CS)                      | (CS)                            | (CS)                      | (CS)                            | (CS)                            | (CS)                            |
| Writing – review<br>& editing | (AB),<br>(GA),<br>(RM)                   | (CS), (AB),<br>(RM), (GA) | (CS),<br>(OM),<br>(AB),<br>(GA) | (CS), (OM),<br>(AB), (GA) | (CS),<br>(OM),<br>(AB),<br>(GA) | (CS),<br>(NJ),<br>(AB),<br>(GA) | (CS),<br>(OM),<br>(AB),<br>(GA) |

887

888 <sup>a</sup>Author A: Cárdenas-Sandoval (CS)

889 <sup>b</sup>Author B: Pastrana-Rendón (PR)

890 <sup>c</sup>Author C: Ávila-Bernal (AB)

891 <sup>d</sup>Author D: Ramírez-Martínez (RM)

892 <sup>e</sup>Author E: Navarrete-Jimenez (NJ)

893 <sup>f</sup>Author F: Ondo-Mendez (OM)

894 <sup>g</sup>Author G: Garzón-Alvarado (GA)

895

## 896 **Conflict of interest**

897 The authors report no conflicts of interest.

898

899 **Supporting information**

900 S1 File: Correction of elastic modulus using the asymptotical correction mode

901 S2 File: Example of shortening area of  $\beta$ -actin analysis using immunohistochemistry (IHC)

902 S3 Movies (A-C): Animations of displacements and harmonics of the natural frequency of  
903 vibration (50<sup>th</sup>) for all groups

904 S4 File: Descriptive statistics and multiple comparisons between all groups

905 S5 File: Python script to create an octahedron tensegrity structure in Abaqus CAE for all groups

Dissect lateral collateral ligament (LCL)

1 Explant ligament

Is the fibroblast culture confluent? No → Maintain cell culture

Yes  
Subculture cells in Groups A, B, and C

2 Apply ultrasound to Groups A and B every 24 h for 5 days

Preserve Group C as control

3 Measure variables

Mechanical

Biological

Elastic modulus

Harmonics

Viability

Proliferation

Migration

ECM synthesis

Cytoskeleton

AFM

FEM

Flow cytometry

MTS assay

Scratch assay

ELISA

Immuno-fluorescence

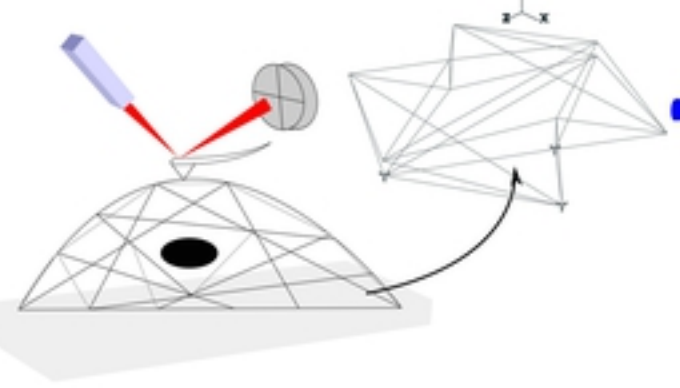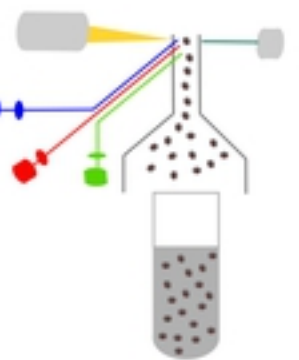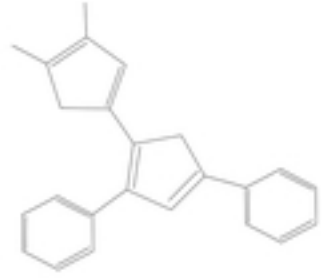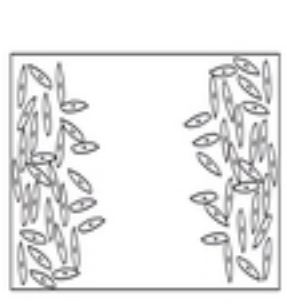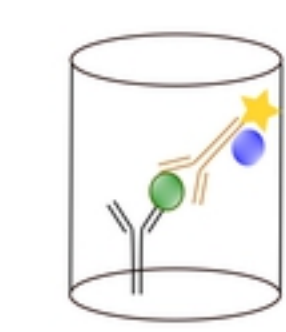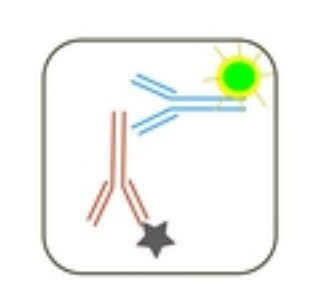

4 Conduct statistical analysis

Analyze results

bioRxiv preprint doi: <https://doi.org/10.1101/2021.11.22.469508>; this version posted November 22, 2021. The copyright holder for this preprint (which was not certified by peer review) is the author/funder, who has granted bioRxiv a license to display the preprint in perpetuity. It is made available under aCC-BY 4.0 International license.

Diagram of the methodology

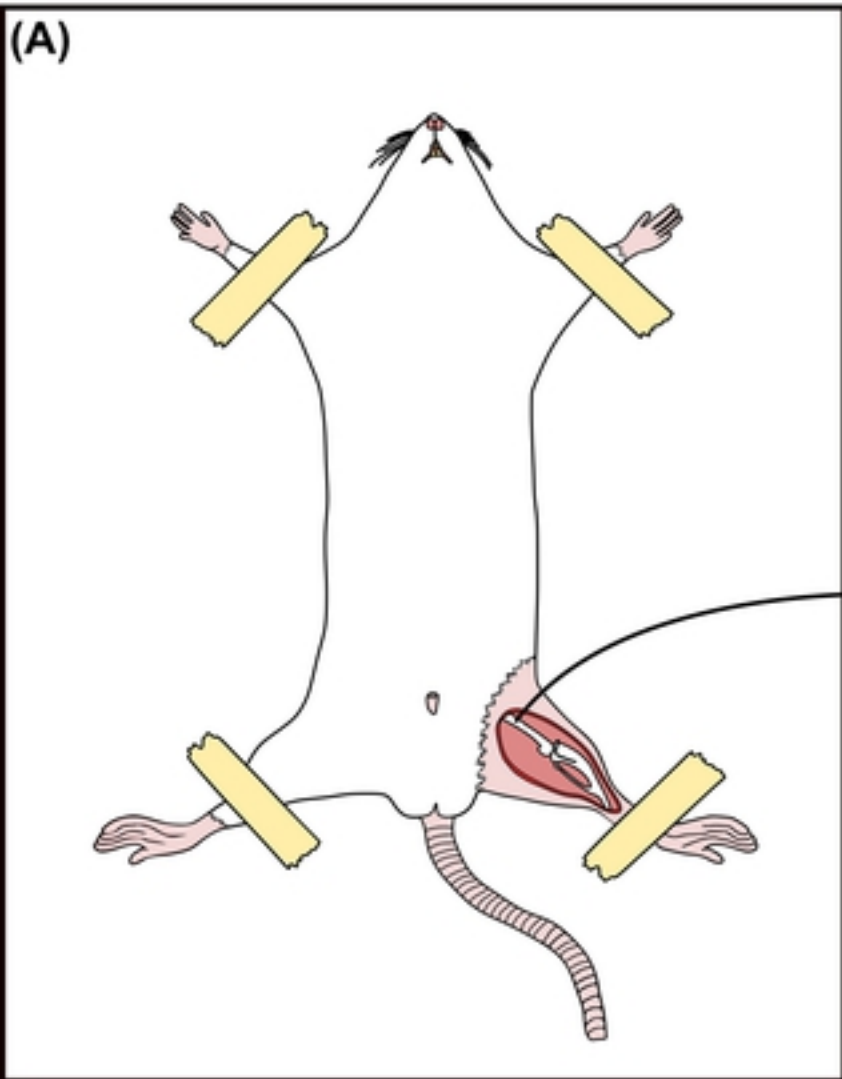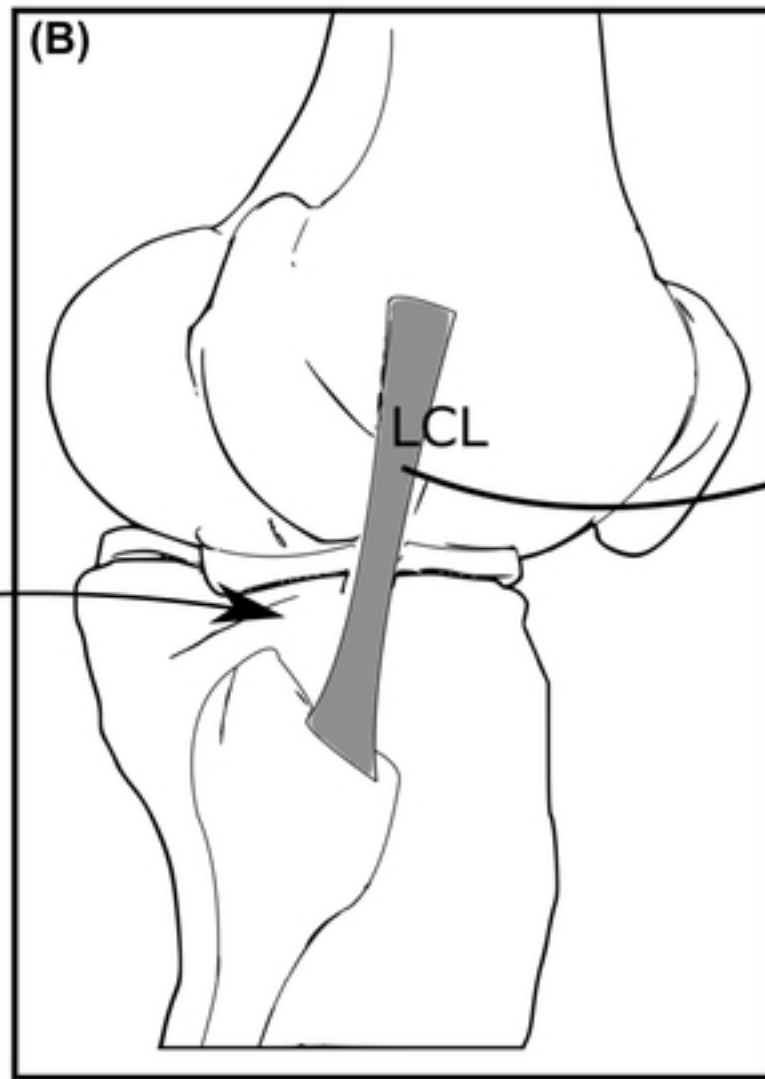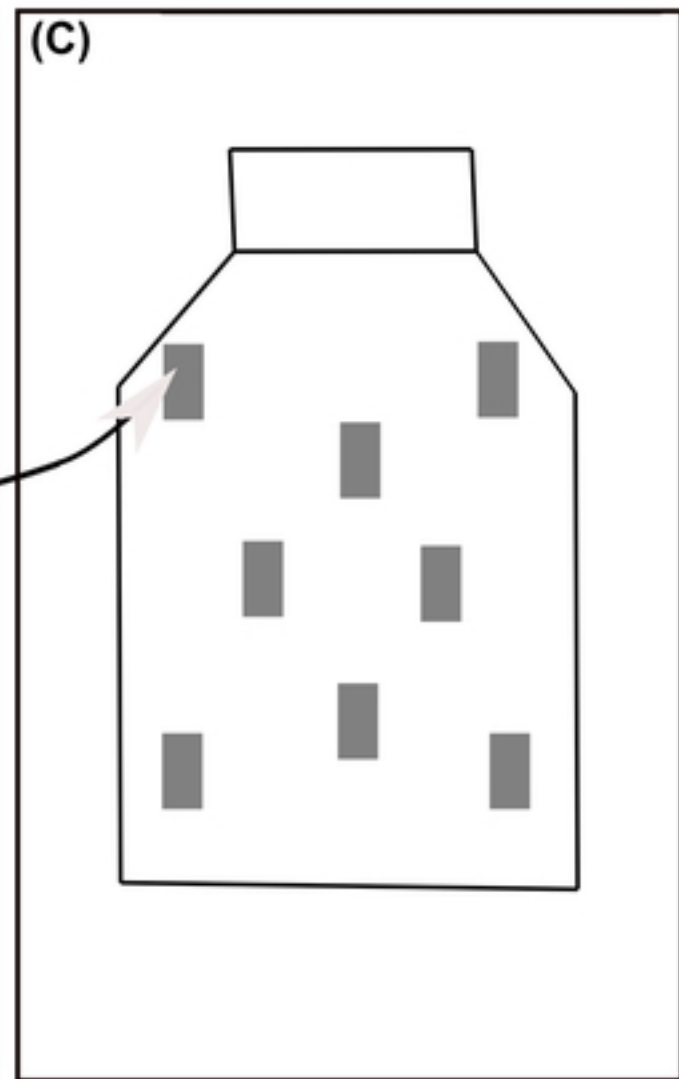

Ligament fibroblast explant



Height (H)

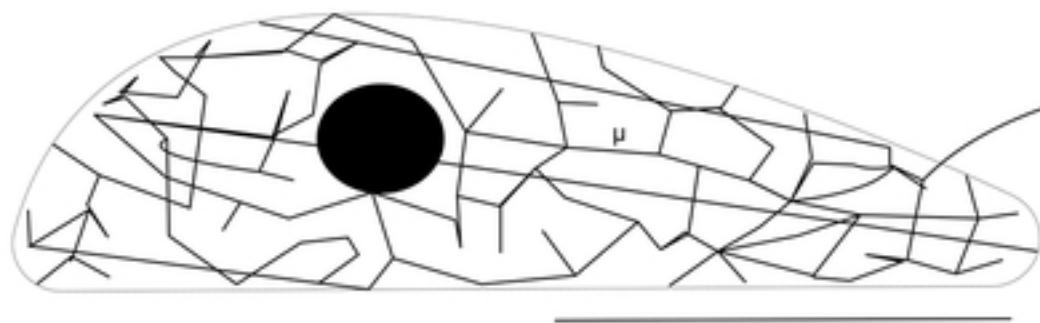

Length contact radius

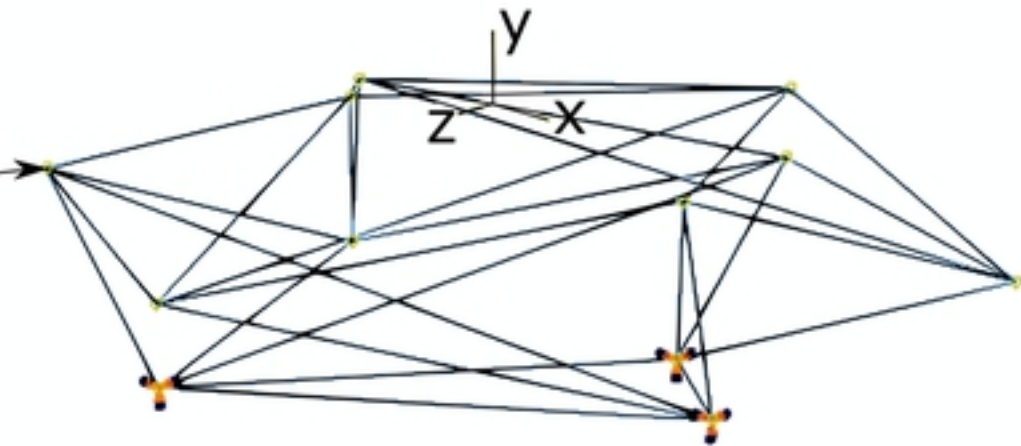

Tensegrity structure

Three-dimensional octahedron tensegrity model

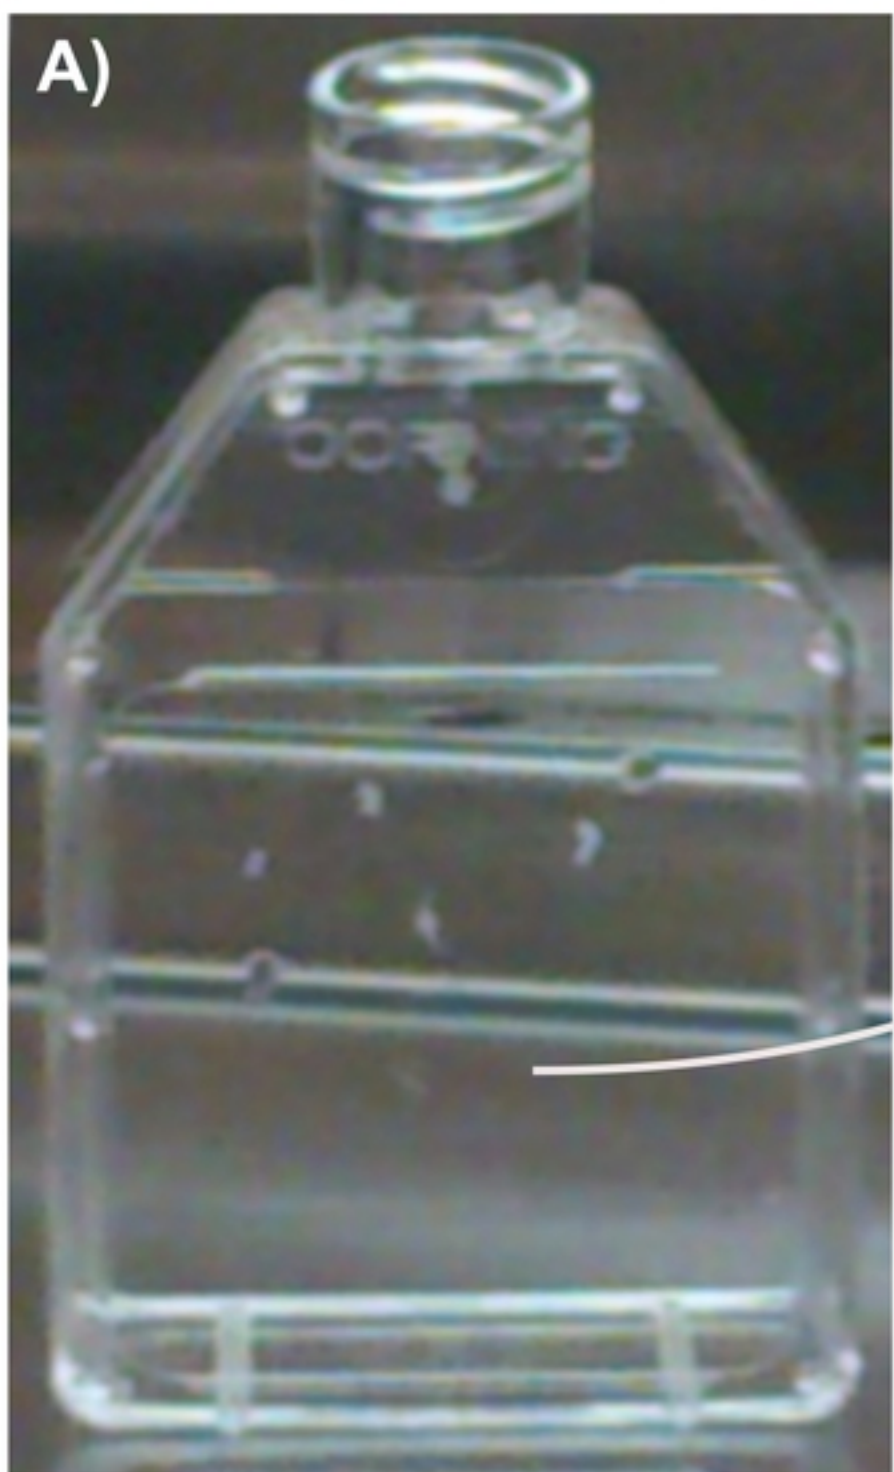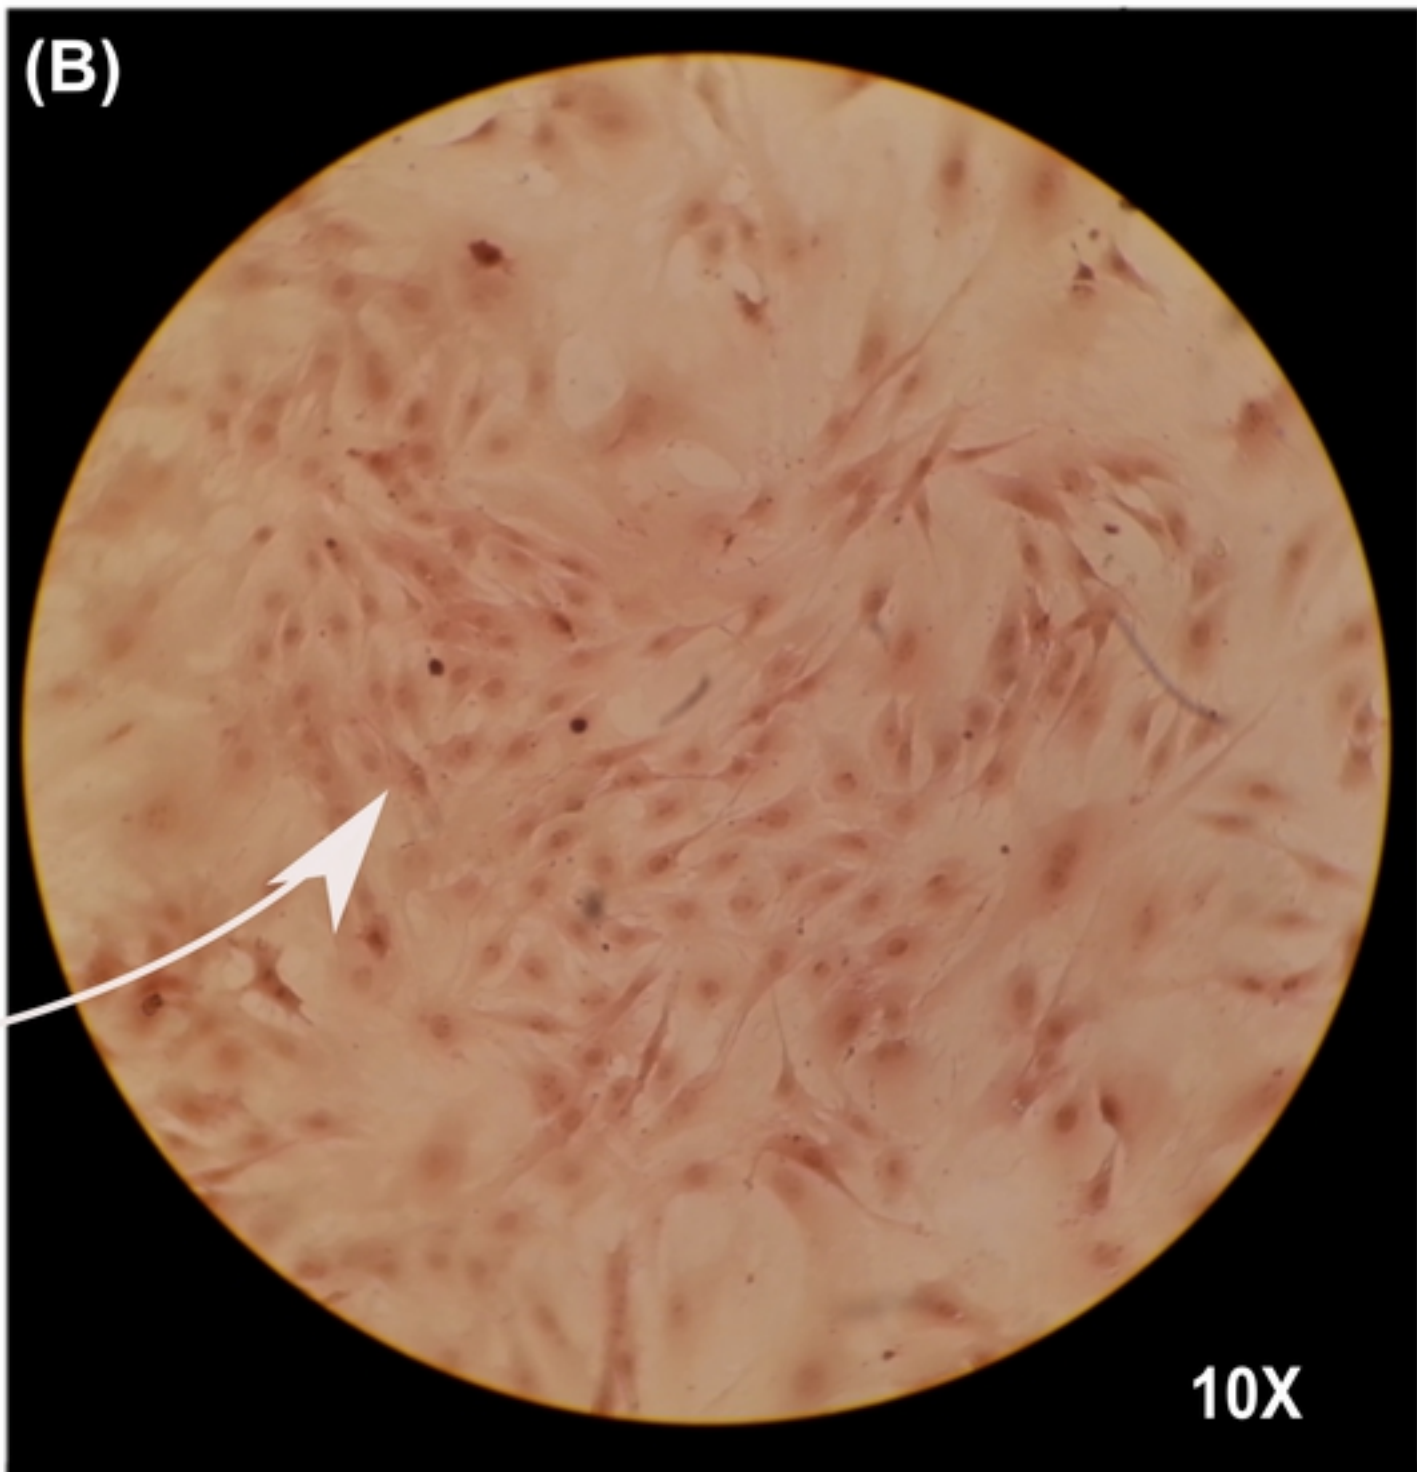

Ligament fibroblasts

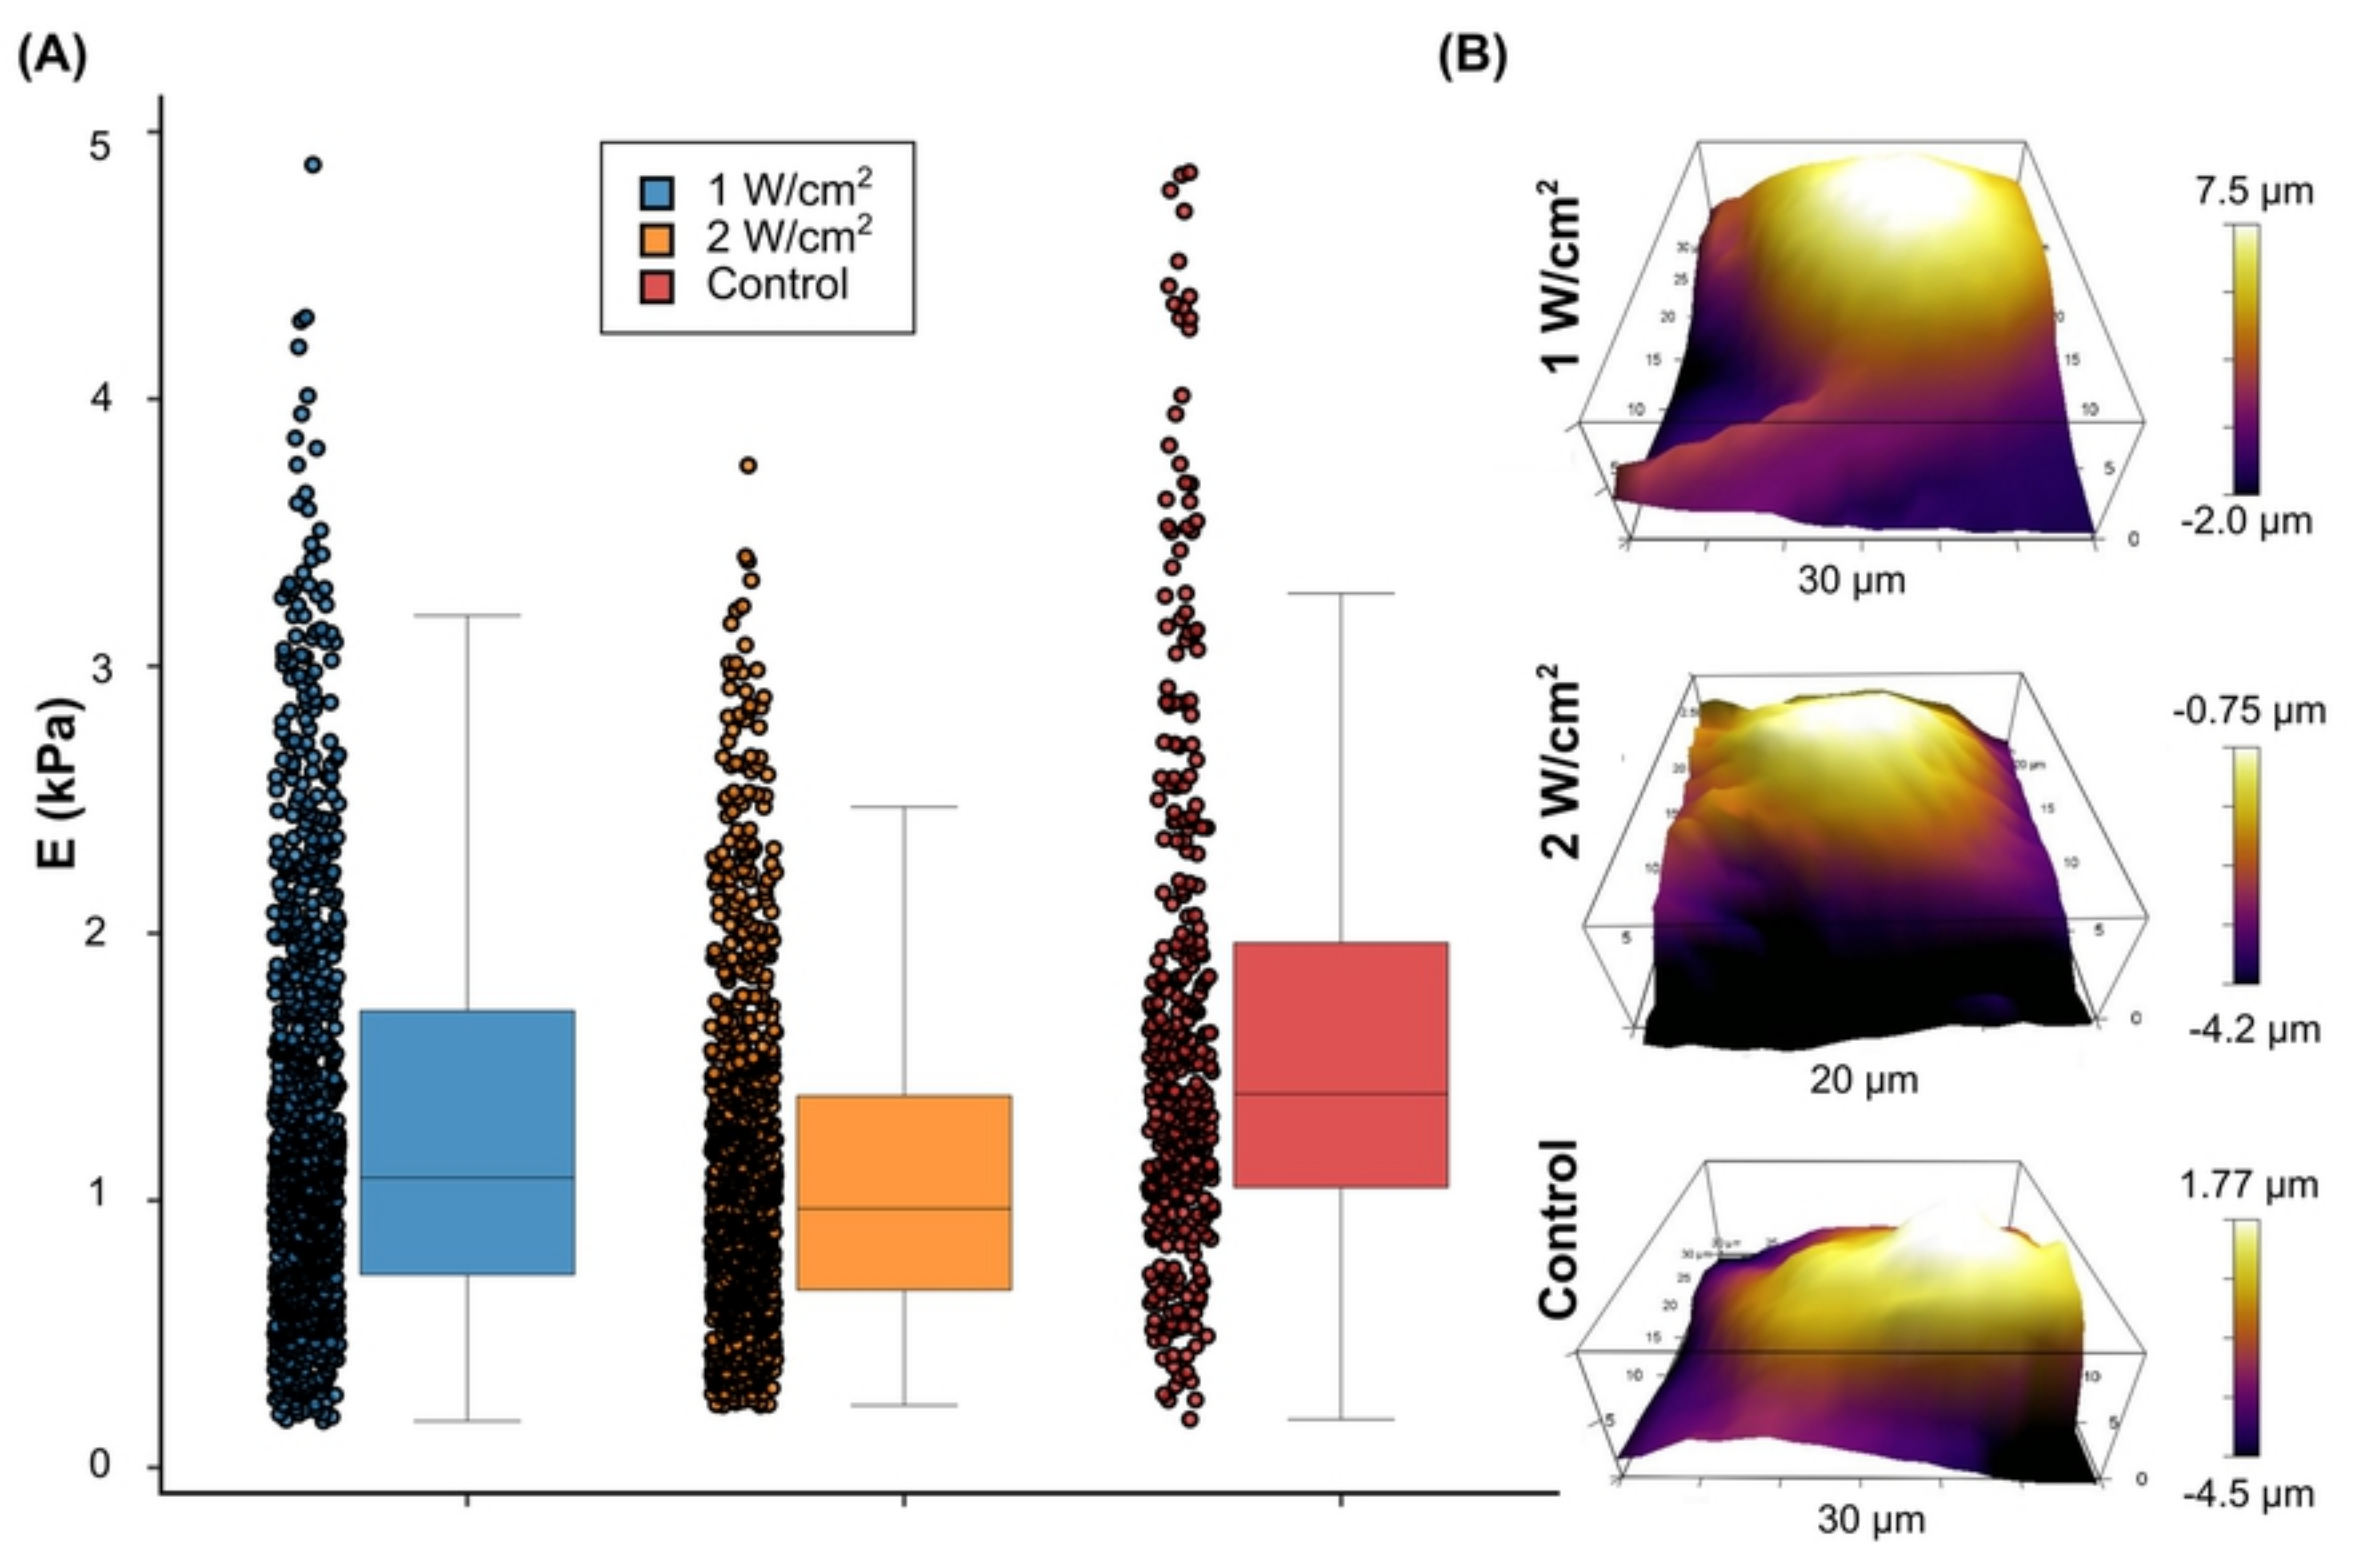

Softening of ligament fibroblast structure due to low and high d

**(A)**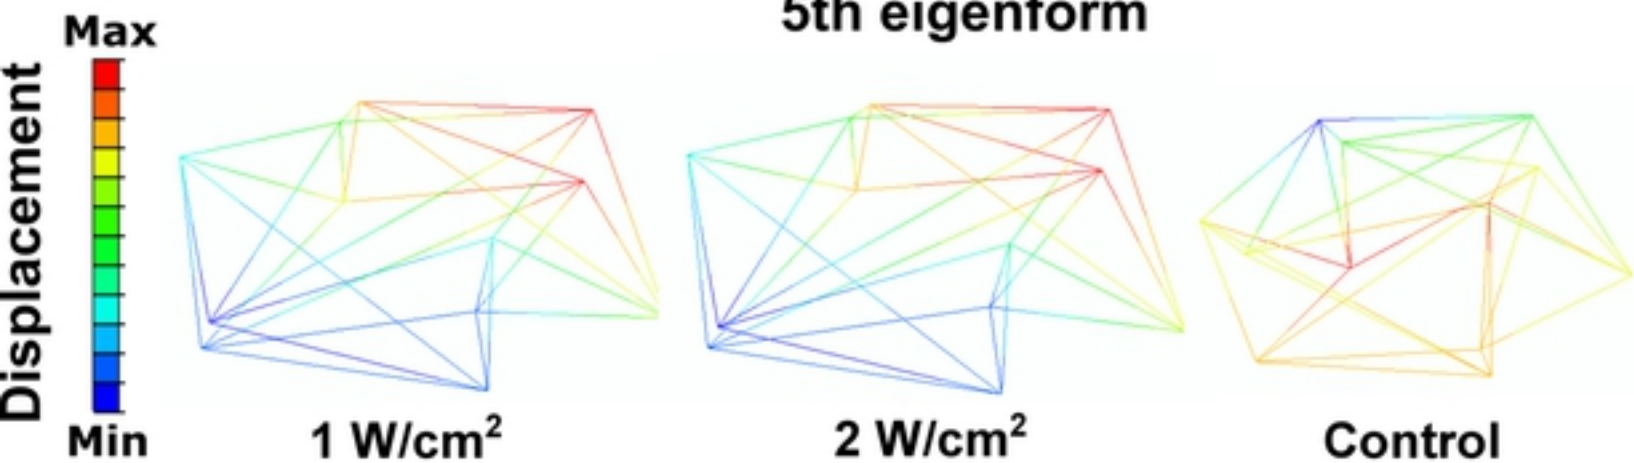**(B)**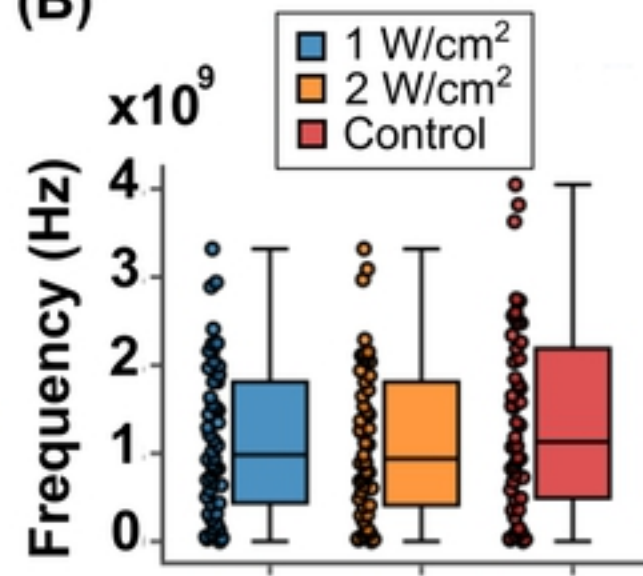

Alteration of ligament fibroblast cytoskeleton due to ultrasound

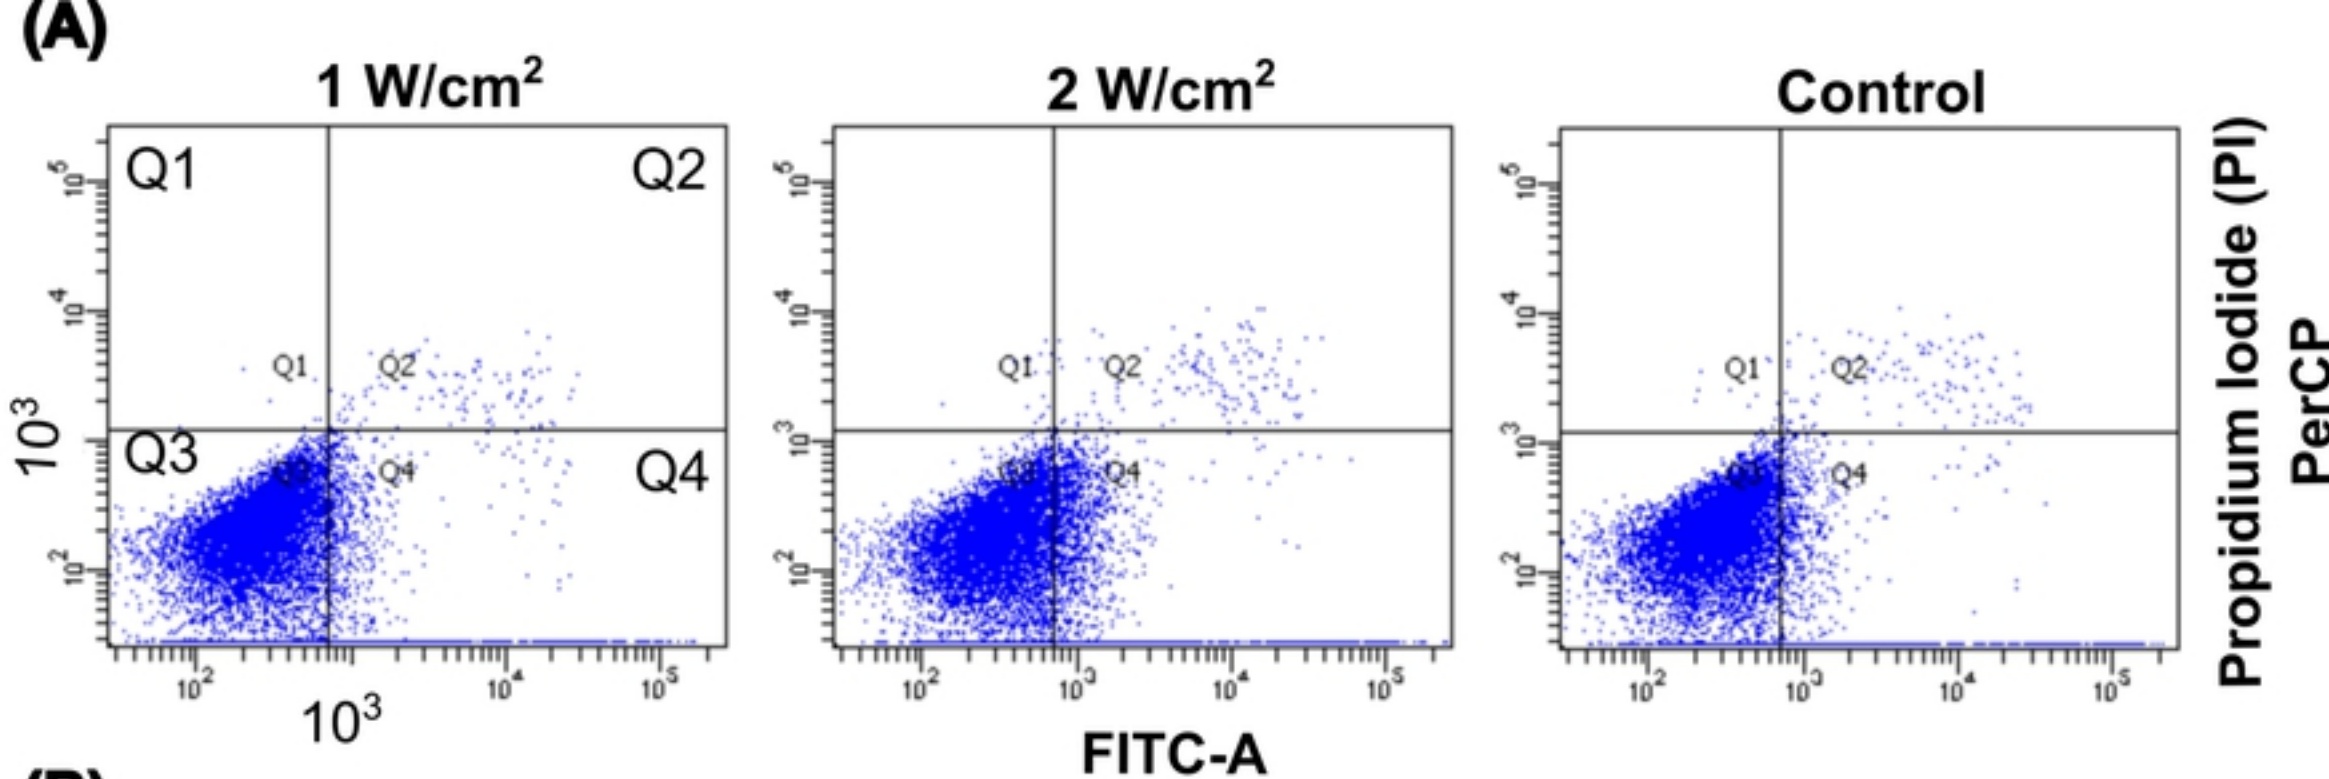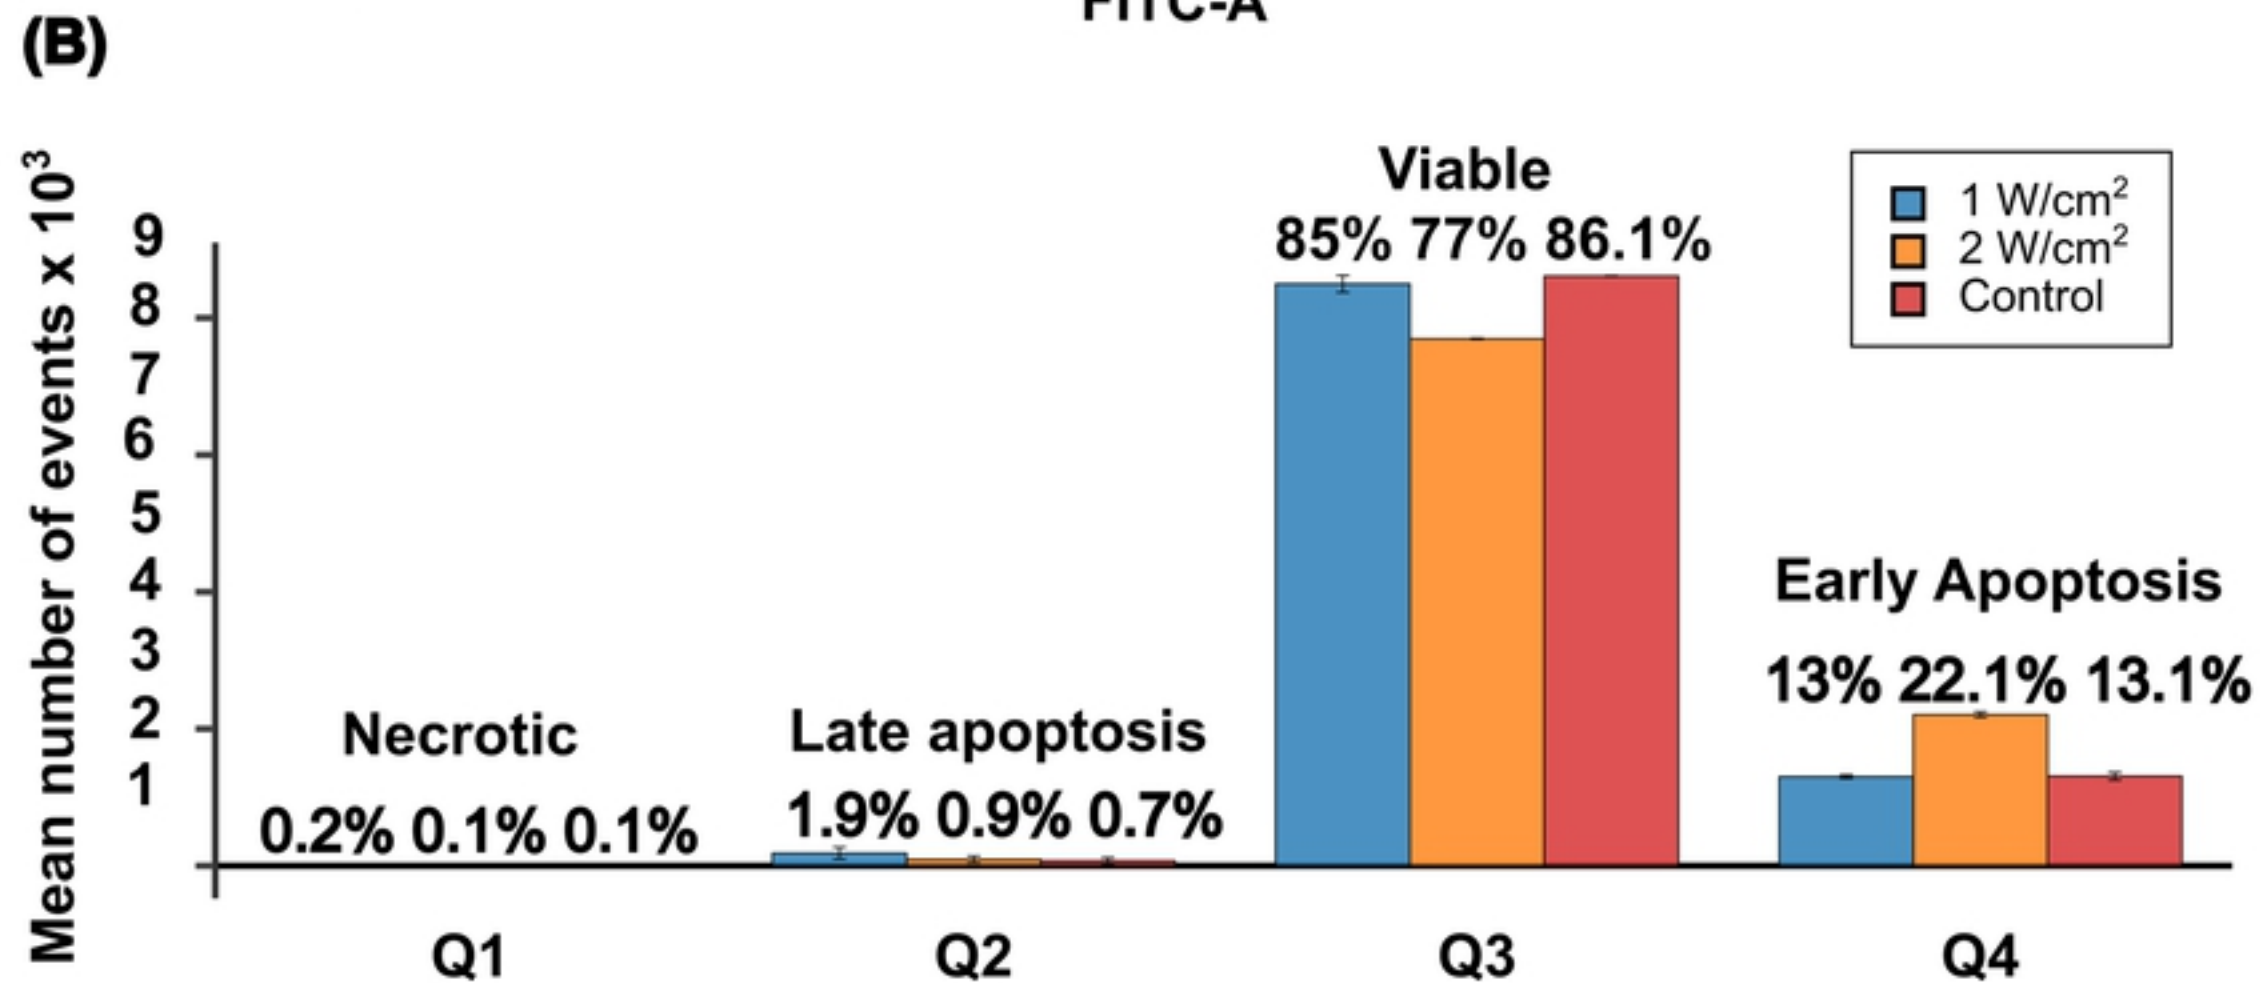

Negligible effect of low and high doses of ultrasound on viability

**(A)**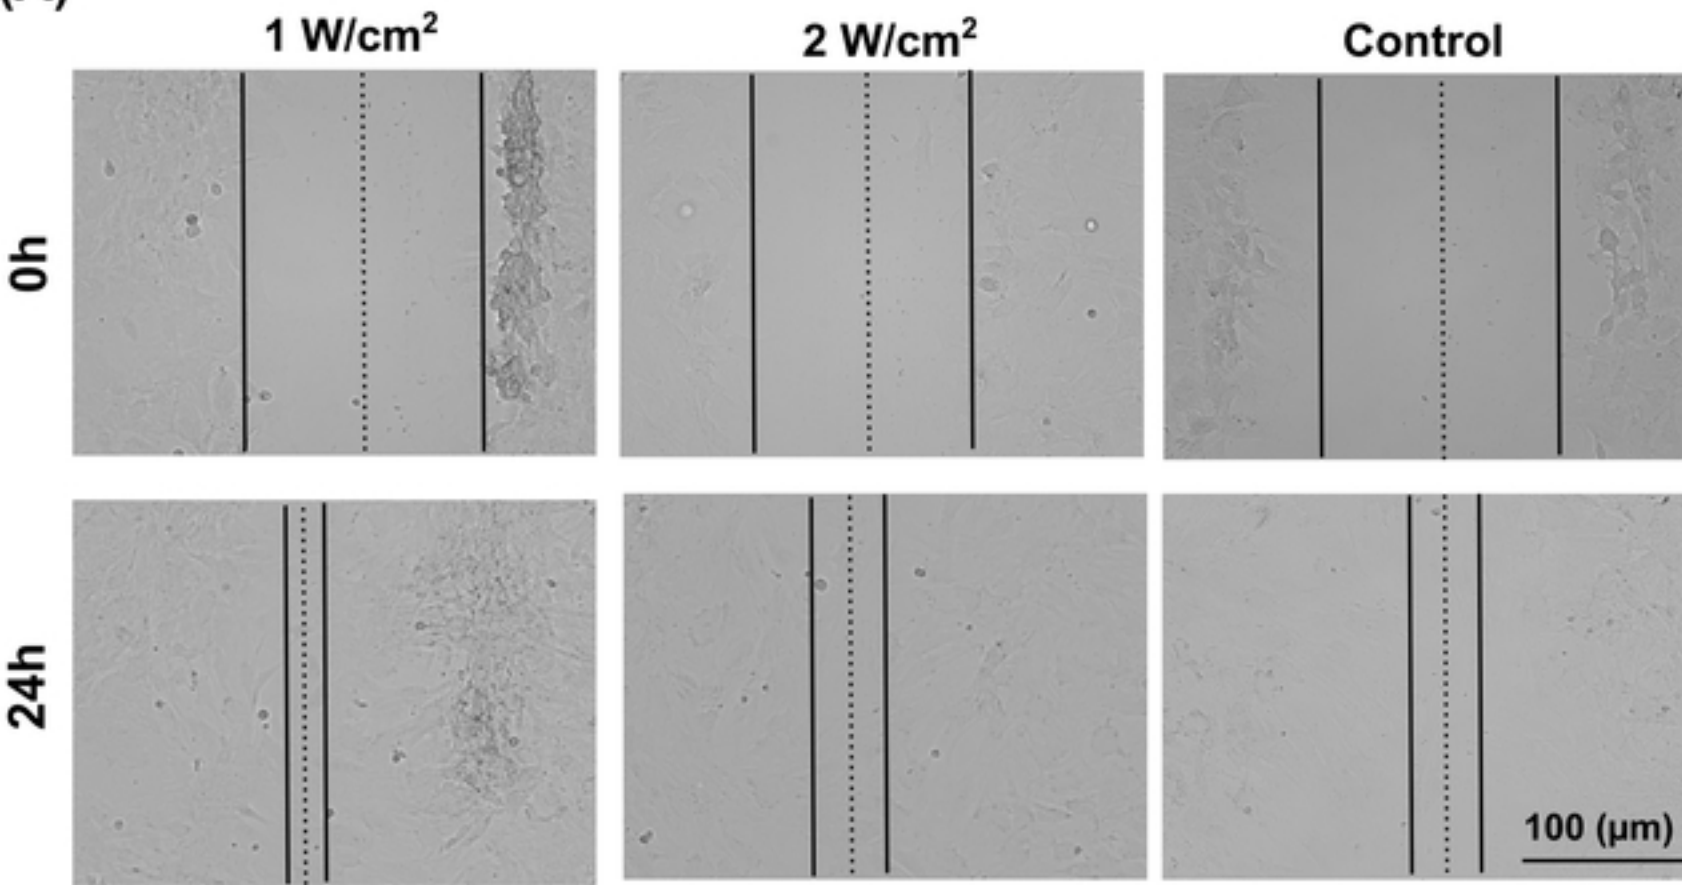**(B)**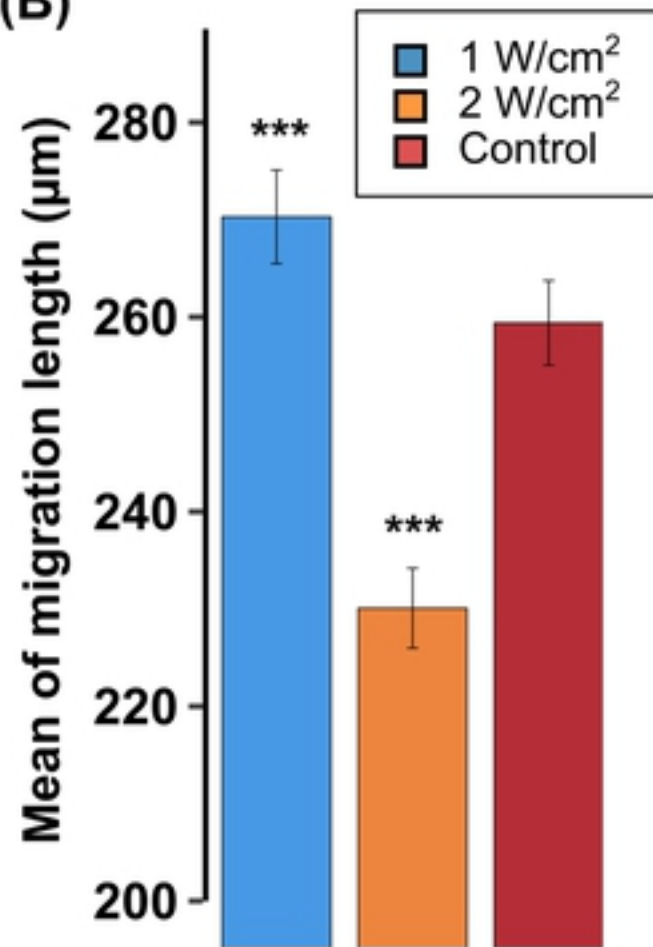

Effect of therapeutic ultrasound on fibroblast cell migration in e

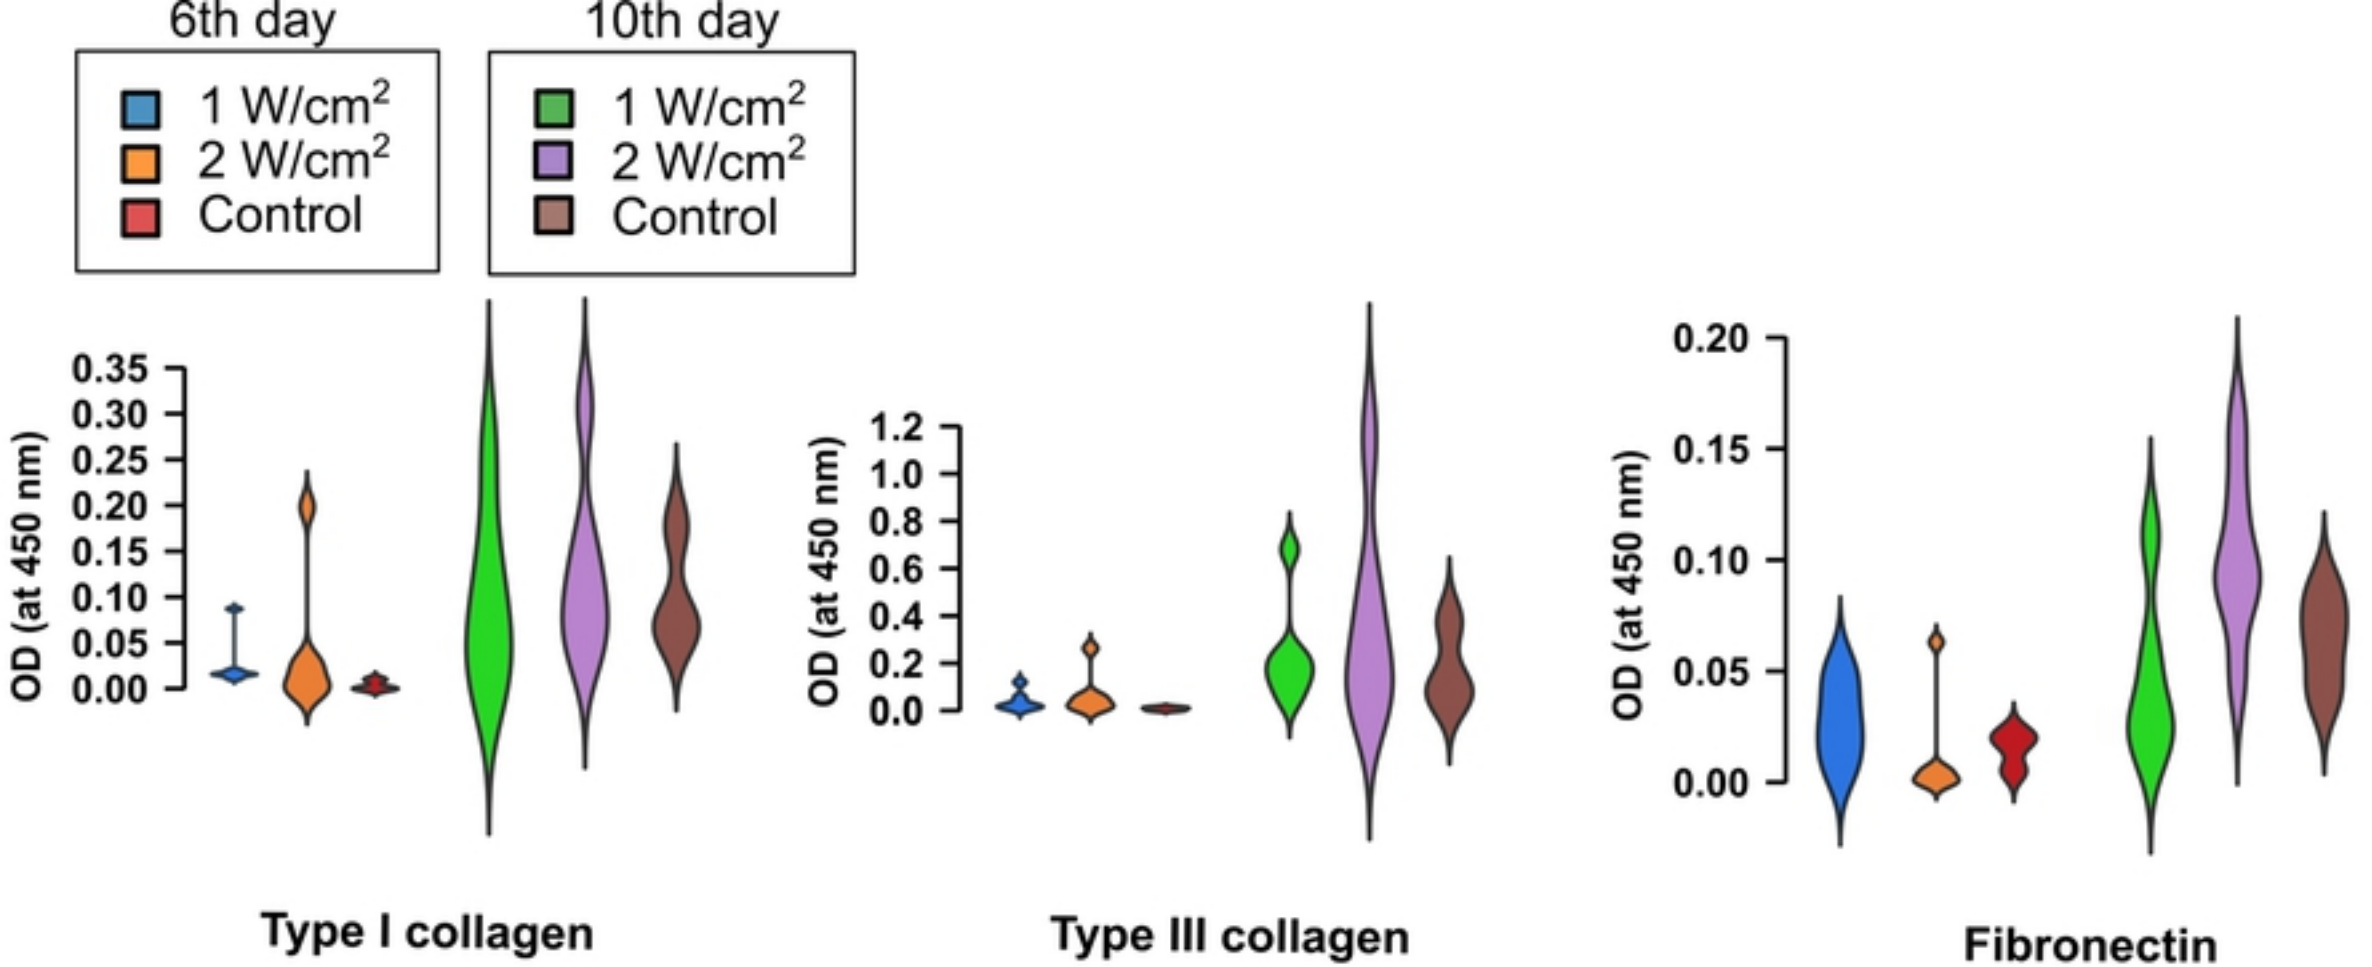

Increase in the optical density (OD) of extracellular matrix (ECM)

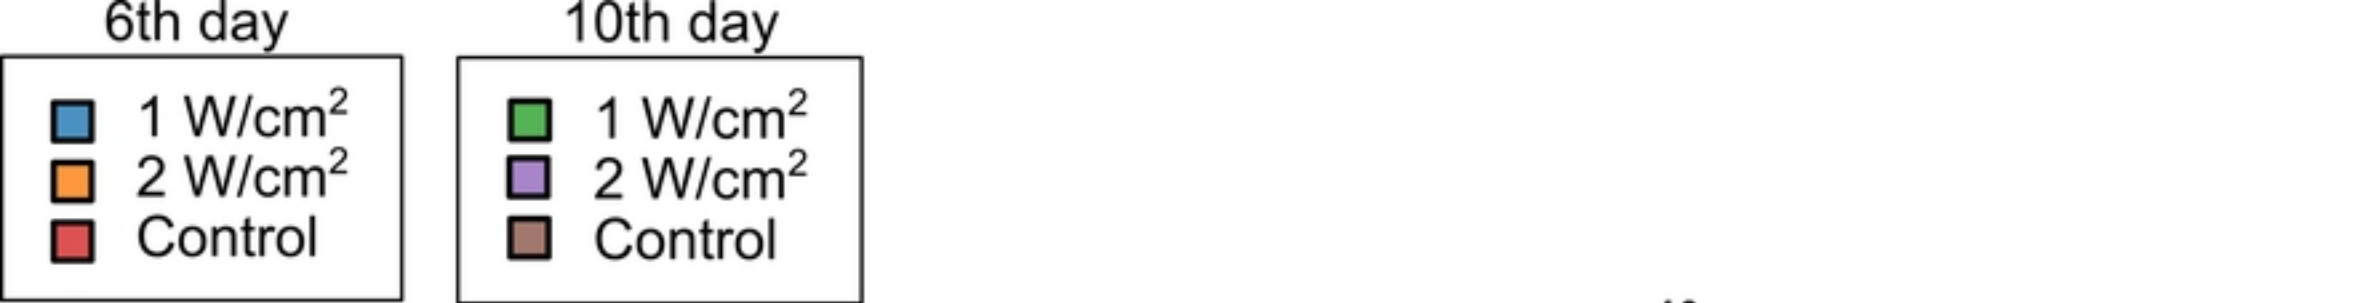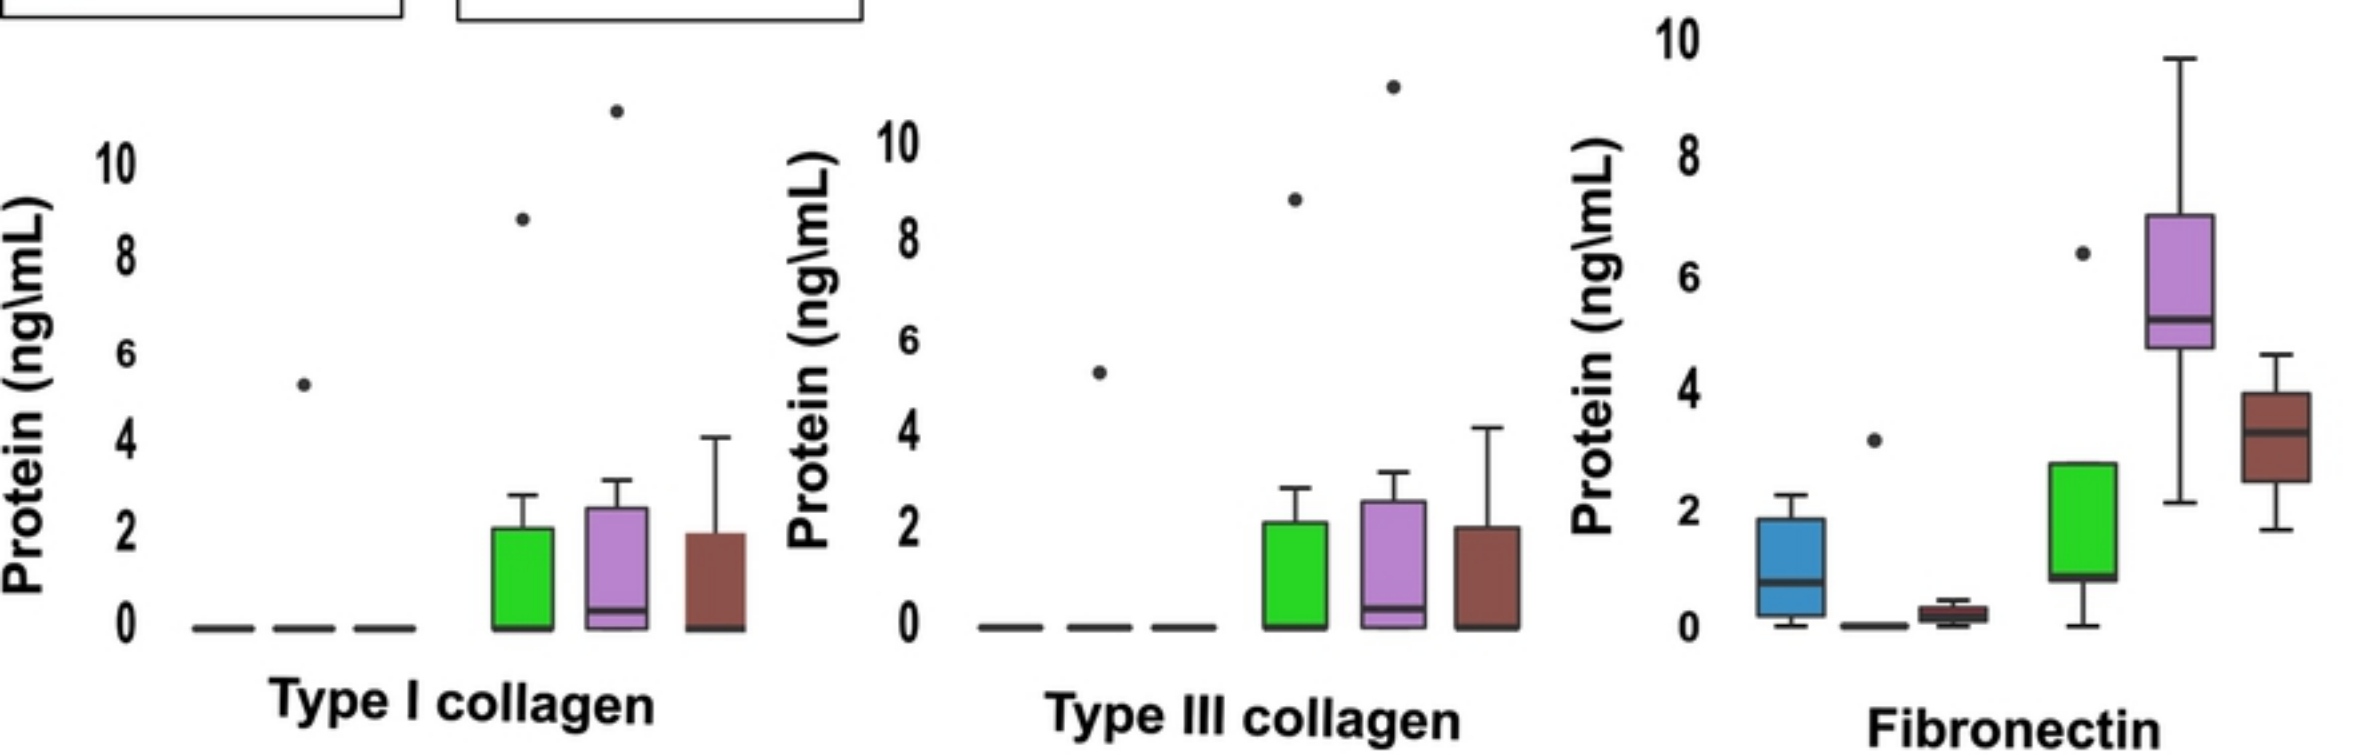

Increase in the concentration of ECM for early and late treatment



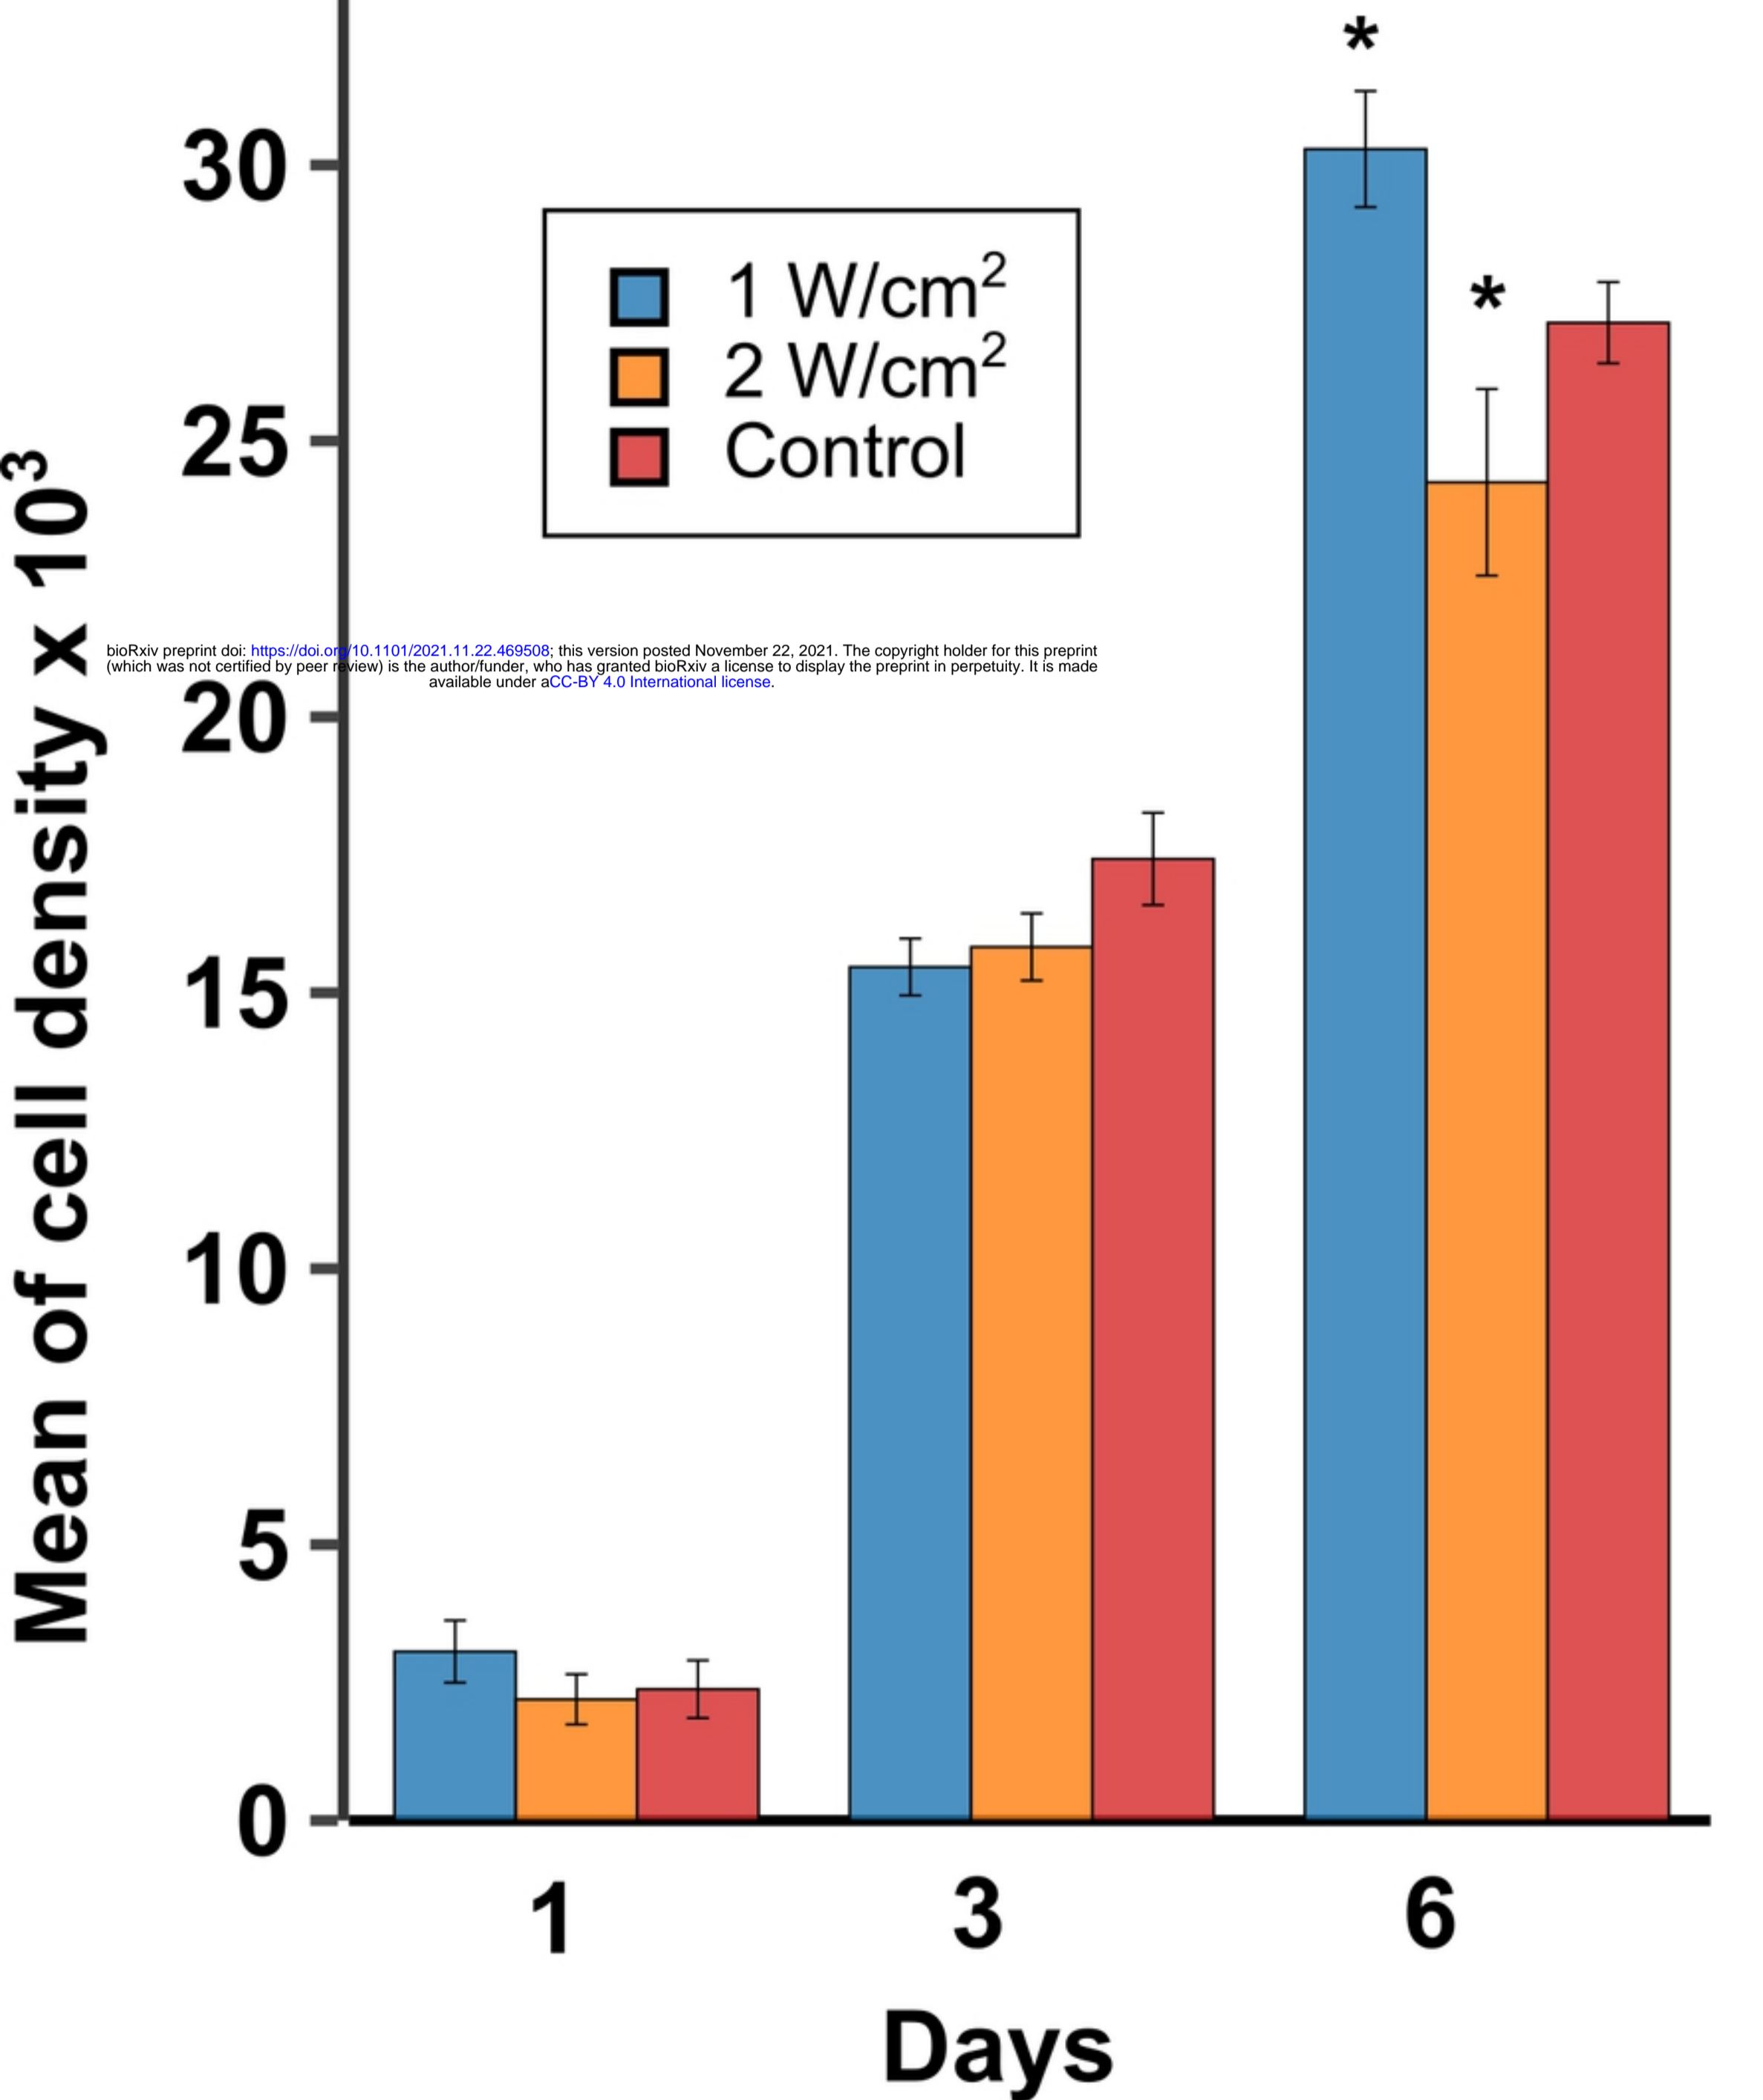

Increase in fibroblast cell proliferation in early treatment due to

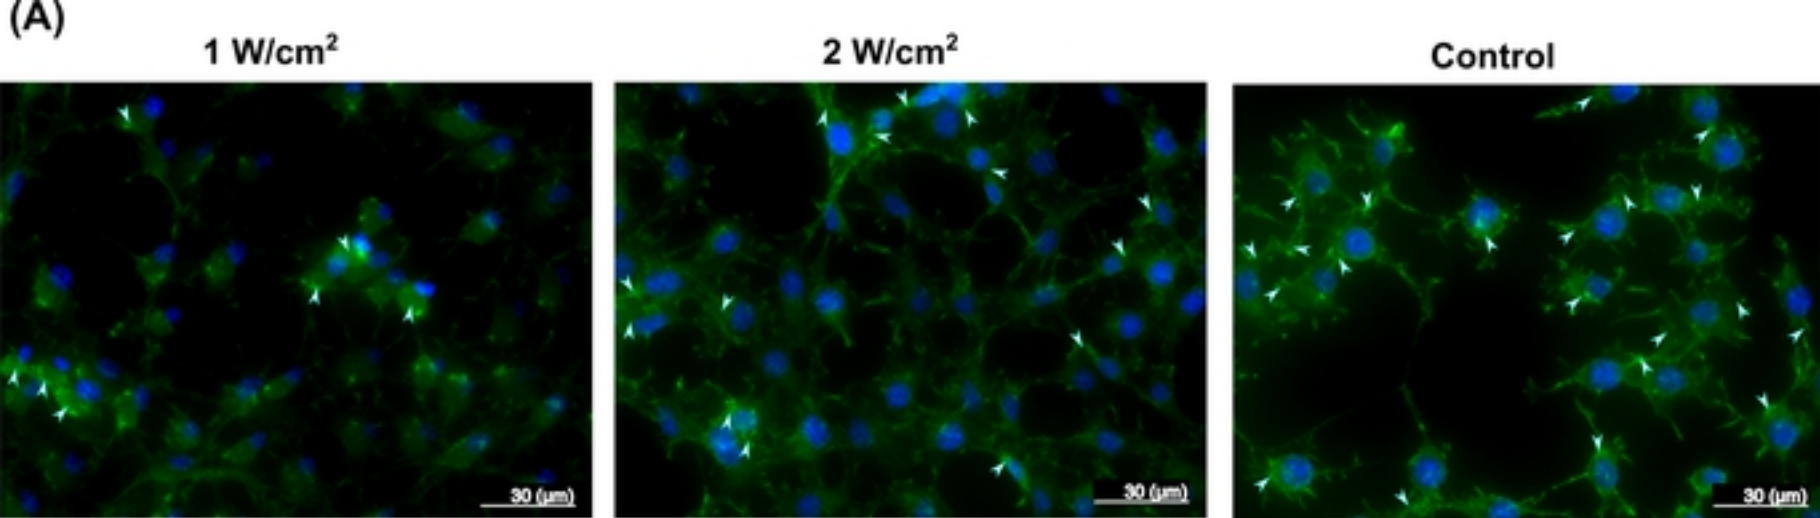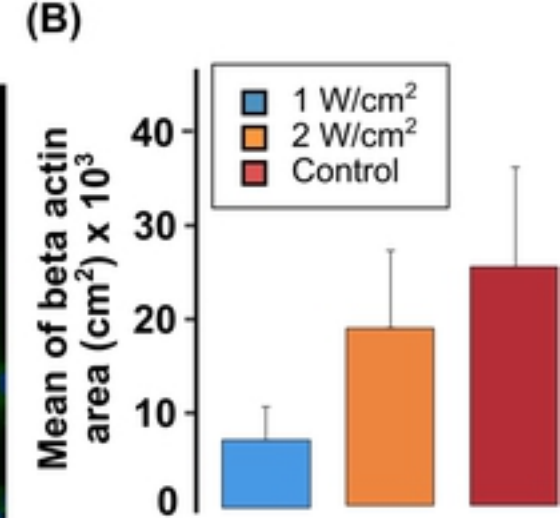

Alteration of  $\beta$ -actin expression to promote early and late treatment
